# Supplementary material
Source: publisher figshare collection journal article supplement (https://gsajournals.figshare.com/ndownloader/files/29162151)
Supplement: Supplementary file 1 [file 29162151]

## Sheet: phytomine
PACid	species	locusName	QTL	transcriptName	proteinName	PFAM	PFAM_DEF	PANTHER	PANTHER_DEF	KOG	KOG_DEF	EC	EC_DEF	KEGG	KEGG_DEF	GO	GO_DEF	PATHWAY	PATHWAY_DEF	alias	defLine
PAC:37938283	S. bicolor	Sobic.001G004800	0	Sobic.001G004800.1	Sobic.001G004800.1.p	PF03629	PF03629 - Domain of unknown function (DUF303)	PTHR31988:SF3; PTHR31988	PTHR31988 - FAMILY NOT NAMED; PTHR31988:SF3 - SUBFAMILY NOT NAMED
PAC:37944173	S. bicolor	Sobic.001G008800	0	Sobic.001G008800.1	Sobic.001G008800.1.p			PTHR35110:SF2; PTHR35110	PTHR35110:SF2 - SUBFAMILY NOT NAMED; PTHR35110 - FAMILY NOT NAMED
PAC:37942222	S. bicolor	Sobic.001G012000	0	Sobic.001G012000.1	Sobic.001G012000.1.p	PF00067	PF00067 - Cytochrome P450	PTHR24298:SF144; PTHR24298	PTHR24298:SF144 - BIFUNCTIONAL DIHYDROCAMALEXATE SYNTHASE/CAMALEXIN SYNTHASE-RELATED; PTHR24298 - FAMILY NOT NAMED			1.14.13.68	1.14.13.68 - 4-hydroxyphenylacetaldehyde oxime monooxygenase	K13029	K13029 - 4-hydroxyphenylacetaldehyde oxime monooxygenase	GO:0005506; GO:0016705; GO:0055114; GO:0004497; GO:0020037	GO:0020037 - Interacting selectively and non-covalently with heme, any compound of iron complexed in a porphyrin (tetrapyrrole) ring.; GO:0005506 - Interacting selectively and non-covalently with iron (Fe) ions.; GO:0004497 - Catalysis of the incorporation of one atom from molecular oxygen into a compound and the reduction of the other atom of oxygen to water.; GO:0016705 - Catalysis of an oxidat…	PWY-861	PWY-861 - ""
PAC:37937577	S. bicolor	Sobic.001G012300	0	Sobic.001G012300.1	Sobic.001G012300.1.p	PF00067	PF00067 - Cytochrome P450	PTHR24298:SF1; PTHR24298	PTHR24298:SF1 - CYTOCHROME P450, FAMILY 79, SUBFAMILY C, POLYPEPTIDE 1-RELATED; PTHR24298 - FAMILY NOT NAMED	KOG0156	KOG0156 - Cytochrome P450 CYP2 subfamily	1.14.13.41	1.14.13.41 - Tyrosine N-monooxygenase	K13027	K13027 - tyrosine N-monooxygenase	GO:0005506; GO:0016705; GO:0055114; GO:0020037	GO:0020037 - Interacting selectively and non-covalently with heme, any compound of iron complexed in a porphyrin (tetrapyrrole) ring.; GO:0005506 - Interacting selectively and non-covalently with iron (Fe) ions.; GO:0016705 - Catalysis of an oxidation-reduction (redox) reaction in which hydrogen or electrons are transferred from each of two donors, and molecular oxygen is reduced or incorporated …	PWY-861	PWY-861 - ""
PAC:37938940	S. bicolor	Sobic.001G012400	0	Sobic.001G012400.1	Sobic.001G012400.1.p	PF00201	PF00201 - UDP-glucoronosyl and UDP-glucosyl transferase	PTHR11926; PTHR11926:SF269	PTHR11926 - GLUCOSYL/GLUCURONOSYL TRANSFERASES; PTHR11926:SF269 - SUBFAMILY NOT NAMED	KOG1192	KOG1192 - UDP-glucuronosyl and UDP-glucosyl transferase	2.4.1.85	2.4.1.85 - Cyanohydrin beta-glucosyltransferase	K13030	K13030 - cyanohydrin beta-glucosyltransferase	GO:0016758; GO:0008152	GO:0016758 - Catalysis of the transfer of a hexosyl group from one compound (donor) to another (acceptor).; GO:0008152 - The chemical reactions and pathways, including anabolism and catabolism, by which living organisms transform chemical substances. Metabolic processes typically transform small molecules, but also include macromolecular processes such as DNA repair and replication, and protein s…	PWY-861	PWY-861 - ""
PAC:37943434	S. bicolor	Sobic.001G013400	0	Sobic.001G013400.1	Sobic.001G013400.1.p	PF03800	PF03800 - Nuf2 family	PTHR21650	PTHR21650 - MEMBRALIN/KINETOCHORE PROTEIN NUF2	KOG4438	KOG4438 - Centromere-associated protein NUF2					GO:0007067; GO:0000775; GO:0009405	GO:0000775 - The region of a chromosome that includes the centromeric DNA and associated proteins. In monocentric chromosomes, this region corresponds to a single area of the chromosome, whereas in holocentric chromosomes, it is evenly distributed along the chromosome.; GO:0007067 - A cell cycle process comprising the steps by which the nucleus of a eukaryotic cell divides; the process involves c…				(1 of 4) PTHR21650 - MEMBRALIN/KINETOCHORE PROTEIN NUF2
PAC:37937426	S. bicolor	Sobic.001G028100	DTFL-MT.1/RSUG-MT.1/JYLD-MT.1/BRIX-MT.1/SUCR-MT.1	Sobic.001G028100.1	Sobic.001G028100.1.p	PF08152; PF00271; PF04851; PF00098	PF00098 - Zinc knuckle; PF08152 - GUCT (NUC152) domain; PF00271 - Helicase conserved C-terminal domain; PF04851 - Type III restriction enzyme, res subunit	PTHR24031; PTHR24031:SF155	PTHR24031:SF155 - DEAD-BOX ATP-DEPENDENT RNA HELICASE 3, CHLOROPLASTIC; PTHR24031 - RNA HELICASE	KOG0331	KOG0331 - ATP-dependent RNA helicase	3.6.4.13	3.6.4.13 - RNA helicase			GO:0003676; GO:0003677; GO:0005524; GO:0005634; GO:0008270; GO:0003723; GO:0004386; GO:0016787	GO:0016787 - Catalysis of the hydrolysis of various bonds, e.g. C-O, C-N, C-C, phosphoric anhydride bonds, etc. Hydrolase is the systematic name for any enzyme of EC class 3.; GO:0004386 - Catalysis of the reaction: NTP + H2O = NDP + phosphate, to drive the unwinding of a DNA or RNA helix.; GO:0003723 - Interacting selectively and non-covalently with an RNA molecule or a portion thereof.; GO:0003…
PAC:37941722	S. bicolor	Sobic.001G030600	DTFL-MT.1/RSUG-MT.1/JYLD-MT.1/BRIX-MT.1/SUCR-MT.1	Sobic.001G030600.1	Sobic.001G030600.1.p	PF00201	PF00201 - UDP-glucoronosyl and UDP-glucosyl transferase	PTHR11926; PTHR11926:SF244	PTHR11926 - GLUCOSYL/GLUCURONOSYL TRANSFERASES; PTHR11926:SF244 - SUBFAMILY NOT NAMED			2.4.1.202	2.4.1.202 - 2,4-dihydroxy-7-methoxy-2H-1,4-benzoxazin-3(4H)-one 2-D- glucosyltransferase			GO:0016758; GO:0008152	GO:0016758 - Catalysis of the transfer of a hexosyl group from one compound (donor) to another (acceptor).; GO:0008152 - The chemical reactions and pathways, including anabolism and catabolism, by which living organisms transform chemical substances. Metabolic processes typically transform small molecules, but also include macromolecular processes such as DNA repair and replication, and protein s…	PWY-6949; PWY-4161	PWY-4161 - ""; PWY-6949 - ""
PAC:37941082	S. bicolor	Sobic.001G036300	DTFL-MT.1/RSUG-MT.1/JYLD-MT.1/BRIX-MT.1/SUCR-MT.1	Sobic.001G036300.1	Sobic.001G036300.1.p	PF09127; PF01433	PF01433 - Peptidase family M1; PF09127 - Leukotriene A4 hydrolase, C-terminal	PTHR11533	PTHR11533 - PROTEASE M1 ZINC METALLOPROTEASE			3.3.2.6	3.3.2.6 - Leukotriene-A(4) hydrolase	K01254	K01254 - leukotriene-A4 hydrolase	GO:0008270; GO:0019370; GO:0006508; GO:0005488; GO:0008237	GO:0006508 - The hydrolysis of proteins into smaller polypeptides and/or amino acids by cleavage of their peptide bonds.; GO:0008237 - Catalysis of the hydrolysis of peptide bonds by a mechanism in which water acts as a nucleophile, one or two metal ions hold the water molecule in place, and charged amino acid side chains are ligands for the metal ions.; GO:0019370 - The chemical reactions and pa…
PAC:37937584	S. bicolor	Sobic.001G100600	DTFL-MT.1/RSUG-MT.1/JYLD-MT.1/BRIX-MT.1/SUCR-MT.1	Sobic.001G100600.1	Sobic.001G100600.1.p			PTHR33983:SF5; PTHR33983	PTHR33983:SF5 - SUBFAMILY NOT NAMED; PTHR33983 - FAMILY NOT NAMED
PAC:37938462	S. bicolor	Sobic.001G172200	DTFL-MT.1	Sobic.001G172200.1	Sobic.001G172200.1.p
PAC:37938186	S. bicolor	Sobic.001G264201	DTFL-MT.1	Sobic.001G264201.1	Sobic.001G264201.1.p
PAC:37940550	S. bicolor	Sobic.001G481400	DTFL-MT.2/HGHT-MT.1/FBMS-MT.1	Sobic.001G481400.1	Sobic.001G481400.1.p	PF00847	PF00847 - AP2 domain	PTHR31190; PTHR31190:SF4	PTHR31190 - FAMILY NOT NAMED; PTHR31190:SF4 - ETHYLENE-RESPONSIVE TRANSCRIPTION FACTOR ERF071-RELATED					K09286	K09286 - ""	GO:0003677; GO:0003700; GO:0006355	GO:0003677 - Any molecular function by which a gene product interacts selectively and non-covalently with DNA (deoxyribonucleic acid).; GO:0003700 - Interacting selectively and non-covalently with a specific DNA sequence in order to modulate transcription. The transcription factor may or may not also interact selectively with a protein or macromolecular complex.; GO:0006355 - Any process that mod…
PAC:37944927	S. bicolor	Sobic.001G511000	DTFL-MT.2/HGHT-MT.1/FBMS-MT.1	Sobic.001G511000.2	Sobic.001G511000.2.p	PF00854	PF00854 - POT family	PTHR11654:SF103; PTHR11654	PTHR11654:SF103 - SUBFAMILY NOT NAMED; PTHR11654 - OLIGOPEPTIDE TRANSPORTER-RELATED							GO:0016020; GO:0006810; GO:0005215	GO:0005215 - Enables the directed movement of substances (such as macromolecules, small molecules, ions) into, out of or within a cell, or between cells.; GO:0016020 - A lipid bilayer along with all the proteins and protein complexes embedded in it an attached to it.; GO:0006810 - The directed movement of substances (such as macromolecules, small molecules, ions) into, out of or within a cell, or…
PAC:37938078	S. bicolor	Sobic.001G518700	DTFL-MT.2/HGHT-MT.1/FBMS-MT.1	Sobic.001G518700.1	Sobic.001G518700.1.p	PF00304	PF00304 - Gamma-thionin family	PTHR33147	PTHR33147 - FAMILY NOT NAMED							GO:0006952	GO:0006952 - Reactions, triggered in response to the presence of a foreign body or the occurrence of an injury, which result in restriction of damage to the organism attacked or prevention/recovery from the infection caused by the attack.
PAC:37937471	S. bicolor	Sobic.001G525900	DTFL-MT.2/HGHT-MT.1/FBMS-MT.1	Sobic.001G525900.2	Sobic.001G525900.2.p	PF05920; PF07526	PF07526 - Associated with HOX; PF05920 - Homeobox KN domain	PTHR11850:SF105; PTHR11850	PTHR11850 - HOMEOBOX PROTEIN TRANSCRIPTION FACTORS; PTHR11850:SF105 - SUBFAMILY NOT NAMED	KOG0773	KOG0773 - Transcription factor MEIS1 and related HOX domain proteins					GO:0003677; GO:0006355	GO:0003677 - Any molecular function by which a gene product interacts selectively and non-covalently with DNA (deoxyribonucleic acid).; GO:0006355 - Any process that modulates the frequency, rate or extent of cellular DNA-templated transcription.				(1 of 1) PTHR11850//PTHR11850:SF105 - HOMEOBOX PROTEIN TRANSCRIPTION FACTORS // SUBFAMILY NOT NAMED
PAC:37940294	S. bicolor	Sobic.001G534532	DTFL-MT.2/HGHT-MT.1/FBMS-MT.1	Sobic.001G534532.1	Sobic.001G534532.1.p	PF00069	PF00069 - Protein kinase domain	PTHR27003:SF119; PTHR27003	PTHR27003:SF119 - SUBFAMILY NOT NAMED; PTHR27003 - FAMILY NOT NAMED	KOG1187	KOG1187 - Serine/threonine protein kinase	2.7.11.1	2.7.11.1 - Non-specific serine/threonine protein kinase			GO:0005524; GO:0004713; GO:0004672; GO:0006468	GO:0006468 - The process of introducing a phosphate group on to a protein.; GO:0004713 - Catalysis of the reaction: ATP + a protein tyrosine = ADP + protein tyrosine phosphate.; GO:0004672 - Catalysis of the phosphorylation of an amino acid residue in a protein, usually according to the reaction: a protein + ATP = a phosphoprotein + ADP.; GO:0005524 - Interacting selectively and non-covalently wi…
PAC:37942176	S. bicolor	Sobic.001G538100	DTFL-MT.2/HGHT-MT.1/FBMS-MT.1	Sobic.001G538100.1	Sobic.001G538100.1.p	PF13639	PF13639 - Ring finger domain	PTHR16047:SF9; PTHR16047	PTHR16047:SF9 - SUBFAMILY NOT NAMED; PTHR16047 - RFWD3 PROTEIN	KOG1645	KOG1645 - RING-finger-containing E3 ubiquitin ligase			K15691	K15691 - ""	GO:0008270; GO:0005515	GO:0005515 - Interacting selectively and non-covalently with any protein or protein complex (a complex of two or more proteins that may include other nonprotein molecules).; GO:0008270 - Interacting selectively and non-covalently with zinc (Zn) ions.
PAC:37951462	S. bicolor	Sobic.002G067000	0	Sobic.002G067000.1	Sobic.002G067000.1.p	PF14363; PF00004	PF14363 - Domain associated at C-terminal with AAA; PF00004 - ATPase family associated with various cellular activities (AAA)	PTHR23070; PTHR23070:SF20	PTHR23070 - BCS1 AAA-TYPE ATPASE; PTHR23070:SF20 - SUBFAMILY NOT NAMED	KOG0743	KOG0743 - AAA+-type ATPase					GO:0005524	GO:0005524 - Interacting selectively and non-covalently with ATP, adenosine 5'-triphosphate, a universally important coenzyme and enzyme regulator.
PAC:37949618	S. bicolor	Sobic.002G075800	0	Sobic.002G075800.1	Sobic.002G075800.1.p	PF05691	PF05691 - Raffinose synthase or seed imbibition protein Sip1	PTHR31268; PTHR31268:SF9	PTHR31268:SF9 - SUBFAMILY NOT NAMED; PTHR31268 - FAMILY NOT NAMED			2.4.1.82	2.4.1.82 - Galactinol--sucrose galactosyltransferase	K06617	K06617 - raffinose synthase	GO:0003824	GO:0003824 - Catalysis of a biochemical reaction at physiological temperatures. In biologically catalyzed reactions, the reactants are known as substrates, and the catalysts are naturally occurring macromolecular substances known as enzymes. Enzymes possess specific binding sites for substrates, and are usually composed wholly or largely of protein, but RNA that has catalytic activity (ribozyme) …	PWY-5337	PWY-5337 - ""
PAC:37952584	S. bicolor	Sobic.002G079300	0	Sobic.002G079300.1	Sobic.002G079300.1.p	PF00891	PF00891 - O-methyltransferase	PTHR11746; PTHR11746:SF97	PTHR11746 - O-METHYLTRANSFERASE; PTHR11746:SF97 - SUBFAMILY NOT NAMED							GO:0008171; GO:0008168	GO:0008171 - Catalysis of the transfer of a methyl group to the oxygen atom of an acceptor molecule.; GO:0008168 - Catalysis of the transfer of a methyl group to an acceptor molecule.
PAC:37951020	S. bicolor	Sobic.002G104400	0	Sobic.002G104400.1	Sobic.002G104400.1.p	PF00931; PF03106	PF00931 - NB-ARC domain; PF03106 - WRKY DNA -binding domain	PTHR23155; PTHR23155:SF516	PTHR23155 - LEUCINE-RICH REPEAT-CONTAINING PROTEIN; PTHR23155:SF516 - PLANT INTRACELLULAR RAS-GROUP-RELATED LRR PROTEIN 1-RELATED	KOG4658	KOG4658 - Apoptotic ATPase					GO:0003700; GO:0006355; GO:0043565; GO:0043531; GO:0008237	GO:0008237 - Catalysis of the hydrolysis of peptide bonds by a mechanism in which water acts as a nucleophile, one or two metal ions hold the water molecule in place, and charged amino acid side chains are ligands for the metal ions.; GO:0043565 - Interacting selectively and non-covalently with DNA of a specific nucleotide composition, e.g. GC-rich DNA binding, or with a specific sequence motif o…				(1 of 3) PF00931//PF03106 - NB-ARC domain (NB-ARC) // WRKY DNA -binding domain (WRKY)
PAC:37955390	S. bicolor	Sobic.002G124900	0	Sobic.002G124900.1	Sobic.002G124900.1.p	PF05873	PF05873 - ATP synthase D chain, mitochondrial (ATP5H)	PTHR12700; PTHR12700:SF12	PTHR12700:SF12 - ATP SYNTHASE SUBUNIT D, MITOCHONDRIAL; PTHR12700 - FAMILY NOT NAMED	KOG3366	KOG3366 - Mitochondrial F1F0-ATP synthase, subunit d/ATP7			K02138	K02138 - F-type H+-transporting ATPase subunit d	GO:0000276; GO:0019825; GO:0015078; GO:0015986; GO:0020037	GO:0020037 - Interacting selectively and non-covalently with heme, any compound of iron complexed in a porphyrin (tetrapyrrole) ring.; GO:0015078 - Enables the transfer of hydrogen ions from one side of a membrane to the other.; GO:0019825 - Interacting selectively and non-covalently with oxygen (O2).; GO:0000276 - All non-F1 subunits of the mitochondrial hydrogen-transporting ATP synthase, inclu…
PAC:37951756	S. bicolor	Sobic.002G128101	0	Sobic.002G128101.1	Sobic.002G128101.1.p							2.7.11.1	2.7.11.1 - Non-specific serine/threonine protein kinase								(1 of 1200) 2.7.11.1 - Non-specific serine/threonine protein kinase / Threonine-specific protein kinase
PAC:37951164	S. bicolor	Sobic.002G201600	0	Sobic.002G201600.1	Sobic.002G201600.1.p	PF03141	PF03141 - Putative S-adenosyl-L-methionine-dependent methyltransferase	PTHR10108; PTHR10108:SF776	PTHR10108 - METHYLTRANSFERASE; PTHR10108:SF776 - METHYLTRANSFERASE PMT2-RELATED							GO:0008168	GO:0008168 - Catalysis of the transfer of a methyl group to an acceptor molecule.
PAC:37954793	S. bicolor	Sobic.002G203000	0	Sobic.002G203000.1	Sobic.002G203000.1.p	PF14531; PF03822	PF03822 - NAF domain; PF14531 - Kinase-like	PTHR24347:SF202; PTHR24347	PTHR24347:SF202 - SUBFAMILY NOT NAMED; PTHR24347 - SERINE/THREONINE-PROTEIN KINASE	KOG0583	KOG0583 - Serine/threonine protein kinase	2.7.11.1	2.7.11.1 - Non-specific serine/threonine protein kinase			GO:0005524; GO:0004713; GO:0007165; GO:0004672; GO:0006468	GO:0006468 - The process of introducing a phosphate group on to a protein.; GO:0004713 - Catalysis of the reaction: ATP + a protein tyrosine = ADP + protein tyrosine phosphate.; GO:0007165 - The cellular process in which a signal is conveyed to trigger a change in the activity or state of a cell. Signal transduction begins with reception of a signal (e.g. a ligand binding to a receptor or recepto…
PAC:37952854	S. bicolor	Sobic.002G204300	0	Sobic.002G204300.1	Sobic.002G204300.1.p	PF03000; PF00651	PF03000 - NPH3 family; PF00651 - BTB/POZ domain	PTHR32370:SF7; PTHR32370	PTHR32370:SF7 - BTB/POZ DOMAIN-CONTAINING PROTEIN NPY1; PTHR32370 - FAMILY NOT NAMED							GO:0060918; GO:0005515; GO:0048513; GO:0004871	GO:0048513 - Development of a tissue or tissues that work together to perform a specific function or functions. Development pertains to the process whose specific outcome is the progression of a structure over time, from its formation to the mature structure. Organs are commonly observed as visibly distinct structures, but may also exist as loosely associated clusters of cells that work together …
PAC:37949896	S. bicolor	Sobic.002G204400	0	Sobic.002G204400.1	Sobic.002G204400.1.p	PF00225	PF00225 - Kinesin motor domain	PTHR24115:SF459; PTHR24115	PTHR24115:SF459 - CENTROMERE-ASSOCIATED PROTEIN E; PTHR24115 - FAMILY NOT NAMED	KOG0243	KOG0243 - Kinesin-like protein	3.6.4.4	3.6.4.4 - Plus-end-directed kinesin ATPase	K11498	K11498 - ""	GO:0005524; GO:0003777; GO:0005871; GO:0007018; GO:0008017	GO:0005871 - Any complex that includes a dimer of molecules from the kinesin superfamily, a group of related proteins that contain an extended region of predicted alpha-helical coiled coil in the main chain that likely produces dimerization. The native complexes of several kinesin family members have also been shown to contain additional peptides, often designated light chains as all of the nonca…
PAC:37952843	S. bicolor	Sobic.002G220300	0	Sobic.002G220300.1	Sobic.002G220300.1.p	PF02183; PF00046	PF00046 - Homeobox domain; PF02183 - Homeobox associated leucine zipper	PTHR24326:SF209; PTHR24326	PTHR24326 - FAMILY NOT NAMED; PTHR24326:SF209 - SUBFAMILY NOT NAMED					K09338	K09338 - ""	GO:0003677; GO:0003700; GO:0006355; GO:0043565	GO:0043565 - Interacting selectively and non-covalently with DNA of a specific nucleotide composition, e.g. GC-rich DNA binding, or with a specific sequence motif or type of DNA e.g. promotor binding or rDNA binding.; GO:0003677 - Any molecular function by which a gene product interacts selectively and non-covalently with DNA (deoxyribonucleic acid).; GO:0003700 - Interacting selectively and non-…
PAC:37950431	S. bicolor	Sobic.002G220600	0	Sobic.002G220600.1	Sobic.002G220600.1.p	PF02705	PF02705 - K+ potassium transporter	PTHR30540:SF5; PTHR30540	PTHR30540 - OSMOTIC STRESS POTASSIUM TRANSPORTER; PTHR30540:SF5 - SUBFAMILY NOT NAMED							GO:0015079; GO:0071805; GO:0016020	GO:0071805 - A process in which a potassium ion is transported from one side of a membrane to the other.; GO:0016020 - A lipid bilayer along with all the proteins and protein complexes embedded in it an attached to it.; GO:0015079 - Enables the transfer of potassium ions (K+) from one side of a membrane to the other.
PAC:37952014	S. bicolor	Sobic.002G227300	0	Sobic.002G227300.1	Sobic.002G227300.1.p			PTHR36324:SF1; PTHR36324	PTHR36324 - FAMILY NOT NAMED; PTHR36324:SF1 - SUBFAMILY NOT NAMED
PAC:37954977	S. bicolor	Sobic.002G259900	0	Sobic.002G259900.1	Sobic.002G259900.1.p	PF13889; PF13915	PF13915 - Domain of unknown function (DUF4210); PF13889 - Chromosome segregation during meiosis	PTHR13199; PTHR13199:SF15	PTHR13199:SF15 - SUBFAMILY NOT NAMED; PTHR13199 - FAMILY NOT NAMED	KOG2306	KOG2306 - Uncharacterized conserved protein
PAC:37953046	S. bicolor	Sobic.002G302000	0	Sobic.002G302000.1	Sobic.002G302000.1.p	PF00722; PF06955	PF06955 - Xyloglucan endo-transglycosylase (XET) C-terminus; PF00722 - Glycosyl hydrolases family 16	PTHR31062:SF18; PTHR31062	PTHR31062 - FAMILY NOT NAMED; PTHR31062:SF18 - SUBFAMILY NOT NAMED			2.4.1.207	2.4.1.207 - Xyloglucan:xyloglucosyl transferase	K08235	K08235 - ""	GO:0005975; GO:0006073; GO:0005618; GO:0048046; GO:0004553; GO:0016762; GO:0010411; GO:0042546	GO:0042546 - A cellular process that results in the biosynthesis of constituent macromolecules, assembly, and arrangement of constituent parts of a cell wall. Includes biosynthesis of constituent macromolecules, such as proteins and polysaccharides, and those macromolecular modifications that are involved in synthesis or assembly of the cellular component. A cell wall is the rigid or semi-rigid e…
PAC:37950624	S. bicolor	Sobic.002G317800	0	Sobic.002G317800.1	Sobic.002G317800.1.p	PF13088	PF13088 - BNR repeat-like domain	PTHR33307; PTHR33307:SF2	PTHR33307:SF2 - BNR/ASP-BOX REPEAT FAMILY PROTEIN; PTHR33307 - FAMILY NOT NAMED												(1 of 2) PTHR33307:SF2 - BNR/ASP-BOX REPEAT FAMILY PROTEIN
PAC:37953799	S. bicolor	Sobic.002G320600	0	Sobic.002G320600.1	Sobic.002G320600.1.p			PTHR31355:SF7; PTHR31355	PTHR31355 - FAMILY NOT NAMED; PTHR31355:SF7 - MICROTUBULE-ASSOCIATED PROTEIN SPIRAL2-LIKE-RELATED							GO:0005488	GO:0005488 - The selective, non-covalent, often stoichiometric, interaction of a molecule with one or more specific sites on another molecule.
PAC:37952779	S. bicolor	Sobic.002G326800	0	Sobic.002G326800.1	Sobic.002G326800.1.p	PF01657; PF00069; PF07714	PF00069 - Protein kinase domain; PF07714 - Protein tyrosine kinase; PF01657 - Salt stress response/antifungal	PTHR27002:SF66; PTHR27002; PTHR27002:SF43	PTHR27002:SF66 - SUBFAMILY NOT NAMED; PTHR27002 - FAMILY NOT NAMED; PTHR27002:SF43 - SUBFAMILY NOT NAMED	KOG1187	KOG1187 - Serine/threonine protein kinase	2.7.11.1	2.7.11.1 - Non-specific serine/threonine protein kinase			GO:0005524; GO:0004672; GO:0006468	GO:0006468 - The process of introducing a phosphate group on to a protein.; GO:0004672 - Catalysis of the phosphorylation of an amino acid residue in a protein, usually according to the reaction: a protein + ATP = a phosphoprotein + ADP.; GO:0005524 - Interacting selectively and non-covalently with ATP, adenosine 5'-triphosphate, a universally important coenzyme and enzyme regulator.				(1 of 30) PF01657//PF07714 - Salt stress response/antifungal (Stress-antifung) // Protein tyrosine kinase (Pkinase_Tyr)
PAC:37952630	S. bicolor	Sobic.002G327201	0	Sobic.002G327201.1	Sobic.002G327201.1.p	PF01657	PF01657 - Salt stress response/antifungal	PTHR32099:SF9; PTHR32099	PTHR32099 - CYSTEINE-RICH REPEAT SECRETORY PROTEIN; PTHR32099:SF9 - SUBFAMILY NOT NAMED												(1 of 3) PTHR32099//PTHR32099:SF9 - CYSTEINE-RICH REPEAT SECRETORY PROTEIN // SUBFAMILY NOT NAMED
PAC:37955302	S. bicolor	Sobic.002G327500	0	Sobic.002G327500.1	Sobic.002G327500.1.p	PF01657; PF07714	PF07714 - Protein tyrosine kinase; PF01657 - Salt stress response/antifungal	PTHR27002; PTHR27002:SF36	PTHR27002 - FAMILY NOT NAMED; PTHR27002:SF36 - SUBFAMILY NOT NAMED	KOG1187	KOG1187 - Serine/threonine protein kinase	2.7.11.1	2.7.11.1 - Non-specific serine/threonine protein kinase			GO:0005524; GO:0004672; GO:0006468	GO:0006468 - The process of introducing a phosphate group on to a protein.; GO:0004672 - Catalysis of the phosphorylation of an amino acid residue in a protein, usually according to the reaction: a protein + ATP = a phosphoprotein + ADP.; GO:0005524 - Interacting selectively and non-covalently with ATP, adenosine 5'-triphosphate, a universally important coenzyme and enzyme regulator.
PAC:37953300	S. bicolor	Sobic.002G329100	0	Sobic.002G329100.1	Sobic.002G329100.1.p	PF01657; PF07714	PF07714 - Protein tyrosine kinase; PF01657 - Salt stress response/antifungal	PTHR27002; PTHR27002:SF104	PTHR27002 - FAMILY NOT NAMED; PTHR27002:SF104 - SUBFAMILY NOT NAMED	KOG1187	KOG1187 - Serine/threonine protein kinase	2.7.11.1	2.7.11.1 - Non-specific serine/threonine protein kinase			GO:0005524; GO:0004672; GO:0006468	GO:0006468 - The process of introducing a phosphate group on to a protein.; GO:0004672 - Catalysis of the phosphorylation of an amino acid residue in a protein, usually according to the reaction: a protein + ATP = a phosphoprotein + ADP.; GO:0005524 - Interacting selectively and non-covalently with ATP, adenosine 5'-triphosphate, a universally important coenzyme and enzyme regulator.
PAC:37951739	S. bicolor	Sobic.002G329500	0	Sobic.002G329500.1	Sobic.002G329500.1.p	PF01373	PF01373 - Glycosyl hydrolase family 14	PTHR31352:SF11; PTHR31352	PTHR31352 - FAMILY NOT NAMED; PTHR31352:SF11 - SUBFAMILY NOT NAMED			3.2.1.2	3.2.1.2 - Beta-amylase	K01177	K01177 - beta-amylase	GO:0005975; GO:0000272; GO:0016161	GO:0016161 - Catalysis of the reaction: (1,4-alpha-D-glucosyl)(n+1) + H2O = (1,4-alpha-D-glucosyl)(n-1) + alpha-maltose. This reaction is the hydrolysis of 1,4-alpha-glucosidic linkages in polysaccharides so as to remove successive maltose units from the non-reducing ends of the chains.; GO:0000272 - The chemical reactions and pathways resulting in the breakdown of a polysaccharide, a polymer of …	PWY-6724	PWY-6724 - ""
PAC:37952975	S. bicolor	Sobic.002G397600	0	Sobic.002G397600.1	Sobic.002G397600.1.p	PF00481	PF00481 - Protein phosphatase 2C	PTHR13832; PTHR13832:SF267	PTHR13832:SF267 - PROTEIN PHOSPHATASE 1K, MITOCHONDRIAL; PTHR13832 - PROTEIN PHOSPHATASE 2C	KOG0698	KOG0698 - Serine/threonine protein phosphatase	3.1.3.16	3.1.3.16 - Protein-serine/threonine phosphatase			GO:0004722; GO:0003824; GO:0006470	GO:0004722 - Catalysis of the reaction: protein serine phosphate + H2O = protein serine + phosphate, and protein threonine phosphate + H2O = protein threonine + phosphate.; GO:0003824 - Catalysis of a biochemical reaction at physiological temperatures. In biologically catalyzed reactions, the reactants are known as substrates, and the catalysts are naturally occurring macromolecular substances kn…
PAC:37951141	S. bicolor	Sobic.002G407300	0	Sobic.002G407300.2	Sobic.002G407300.2.p	PF13561	PF13561 - Enoyl-(Acyl carrier protein) reductase	PTHR24322; PTHR24322:SF408	PTHR24322 - FAMILY NOT NAMED; PTHR24322:SF408 - NAD(P)-BINDING ROSSMANN-FOLD SUPERFAMILY PROTEIN	KOG0725	KOG0725 - Reductases with broad range of substrate specificities	1.1.1.331	1.1.1.331 - Secoisolariciresinol dehydrogenase			GO:0016491; GO:0008152; GO:0055114; GO:0008667; GO:0019290	GO:0016491 - Catalysis of an oxidation-reduction (redox) reaction, a reversible chemical reaction in which the oxidation state of an atom or atoms within a molecule is altered. One substrate acts as a hydrogen or electron donor and becomes oxidized, while the other acts as hydrogen or electron acceptor and becomes reduced.; GO:0008667 - Catalysis of the reaction: (2S,3S)-2,3-dihydroxy-2,3-dihydro…	PWY-5466	PWY-5466 - ""		(1 of 5) 1.1.1.331 - Secoisolariciresinol dehydrogenase
PAC:37953580	S. bicolor	Sobic.002G407500	0	Sobic.002G407500.1	Sobic.002G407500.1.p	PF13561	PF13561 - Enoyl-(Acyl carrier protein) reductase	PTHR24322; PTHR24322:SF408	PTHR24322 - FAMILY NOT NAMED; PTHR24322:SF408 - NAD(P)-BINDING ROSSMANN-FOLD SUPERFAMILY PROTEIN	KOG0725	KOG0725 - Reductases with broad range of substrate specificities	1.1.1.331	1.1.1.331 - Secoisolariciresinol dehydrogenase			GO:0016491; GO:0008152; GO:0055114; GO:0004022; GO:0008667; GO:0019290	GO:0016491 - Catalysis of an oxidation-reduction (redox) reaction, a reversible chemical reaction in which the oxidation state of an atom or atoms within a molecule is altered. One substrate acts as a hydrogen or electron donor and becomes oxidized, while the other acts as hydrogen or electron acceptor and becomes reduced.; GO:0008667 - Catalysis of the reaction: (2S,3S)-2,3-dihydroxy-2,3-dihydro…	PWY-5466	PWY-5466 - ""
PAC:37950539	S. bicolor	Sobic.002G409900	0	Sobic.002G409900.1	Sobic.002G409900.1.p	PF01018; PF09269; PF01926	PF09269 - Domain of unknown function (DUF1967); PF01018 - GTP1/OBG; PF01926 - 50S ribosome-binding GTPase	PTHR11702:SF20; PTHR11702	PTHR11702:SF20 - GTP-BINDING PROTEIN OBGC, CHLOROPLASTIC; PTHR11702 - DEVELOPMENTALLY REGULATED GTP-BINDING PROTEIN-RELATED	KOG1489	KOG1489 - Predicted GTP-binding protein (ODN superfamily)					GO:0000166; GO:0000287; GO:0005525; GO:0003924	GO:0000287 - Interacting selectively and non-covalently with magnesium (Mg) ions.; GO:0003924 - Catalysis of the reaction: GTP + H2O = GDP + phosphate.; GO:0000166 - Interacting selectively and non-covalently with a nucleotide, any compound consisting of a nucleoside that is esterified with (ortho)phosphate or an oligophosphate at any hydroxyl group on the ribose or deoxyribose.; GO:0005525 - Int…
PAC:37915170	S. bicolor	Sobic.003G021900	0	Sobic.003G021900.1	Sobic.003G021900.1.p	PF00067	PF00067 - Cytochrome P450	PTHR24286:SF0; PTHR24286	PTHR24286:SF0 - CYTOCHROME P450 61; PTHR24286 - FAMILY NOT NAMED	KOG0157	KOG0157 - Cytochrome P450 CYP4/CYP19/CYP26 subfamilies			K09832	K09832 - cytochrome P450, family 710, subfamily A	GO:0005506; GO:0016705; GO:0055114; GO:0004497; GO:0020037	GO:0020037 - Interacting selectively and non-covalently with heme, any compound of iron complexed in a porphyrin (tetrapyrrole) ring.; GO:0005506 - Interacting selectively and non-covalently with iron (Fe) ions.; GO:0004497 - Catalysis of the incorporation of one atom from molecular oxygen into a compound and the reduction of the other atom of oxygen to water.; GO:0016705 - Catalysis of an oxidat…
PAC:37915091	S. bicolor	Sobic.003G031100	0	Sobic.003G031100.1	Sobic.003G031100.1.p	PF00010	PF00010 - Helix-loop-helix DNA-binding domain	PTHR12565:SF180; PTHR12565	PTHR12565 - STEROL REGULATORY ELEMENT-BINDING PROTEIN; PTHR12565:SF180 - SUBFAMILY NOT NAMED							GO:0046983	GO:0046983 - The formation of a protein dimer, a macromolecular structure consists of two noncovalently associated identical or nonidentical subunits.
PAC:37913756	S. bicolor	Sobic.003G040600	0	Sobic.003G040600.1	Sobic.003G040600.1.p	PF03372	PF03372 - Endonuclease/Exonuclease/phosphatase family	PTHR11200; PTHR11200:SF175	PTHR11200 - INOSITOL 5-PHOSPHATASE; PTHR11200:SF175 - SUBFAMILY NOT NAMED	KOG0565	KOG0565 - Inositol polyphosphate 5-phosphatase and related proteins	3.1.3.56	3.1.3.56 - Inositol-polyphosphate 5-phosphatase			GO:0046856	GO:0046856 - The process of removing one or more phosphate groups from a phosphatidylinositol.	PWY-6358; PWY-6364; PWY-6363	PWY-6358 - ""; PWY-6364 - ""; PWY-6363 - ""
PAC:37914330	S. bicolor	Sobic.003G061300	0	Sobic.003G061300.1	Sobic.003G061300.1.p	PF00205; PF02775; PF02776	PF00205 - Thiamine pyrophosphate enzyme, central domain; PF02776 - Thiamine pyrophosphate enzyme, N-terminal TPP binding domain; PF02775 - Thiamine pyrophosphate enzyme, C-terminal TPP binding domain	PTHR18968:SF130; PTHR18968	PTHR18968:SF130 - SUBFAMILY NOT NAMED; PTHR18968 - THIAMINE PYROPHOSPHATE ENZYMES			4.1.1.1	4.1.1.1 - Pyruvate decarboxylase	K01568	K01568 - pyruvate decarboxylase	GO:0000287; GO:0030976; GO:0003824; GO:0016831	GO:0030976 - Interacting selectively and non-covalently with thiamine pyrophosphate, the diphosphoric ester of thiamine. Acts as a coenzyme of several (de)carboxylases, transketolases, and alpha-oxoacid dehydrogenases.; GO:0016831 - Catalysis of the nonhydrolytic addition or removal of a carboxyl group to or from a compound.; GO:0000287 - Interacting selectively and non-covalently with magnesium …	PWY-5486; PWY-6330	PWY-5486 - ""; PWY-6330 - ""
PAC:37914150	S. bicolor	Sobic.003G064200	0	Sobic.003G064200.2	Sobic.003G064200.2.p	PF00249	PF00249 - Myb-like DNA-binding domain	PTHR12802:SF50; PTHR12802	PTHR12802 - SWI/SNF COMPLEX-RELATED; PTHR12802:SF50 - SUBFAMILY NOT NAMED							GO:0003677	GO:0003677 - Any molecular function by which a gene product interacts selectively and non-covalently with DNA (deoxyribonucleic acid).				(1 of 1) PTHR12802//PTHR12802:SF50 - SWI/SNF COMPLEX-RELATED // SUBFAMILY NOT NAMED
PAC:37918749	S. bicolor	Sobic.003G079700	0	Sobic.003G079700.1	Sobic.003G079700.1.p	PF14380; PF13947; PF00069	PF00069 - Protein kinase domain; PF14380 - Wall-associated receptor kinase C-terminal; PF13947 - Wall-associated receptor kinase galacturonan-binding	PTHR27009:SF10; PTHR27009	PTHR27009 - FAMILY NOT NAMED; PTHR27009:SF10 - SUBFAMILY NOT NAMED	KOG1187	KOG1187 - Serine/threonine protein kinase	3.1.4.46	3.1.4.46 - Glycerophosphodiester phosphodiesterase			GO:0005524; GO:0004713; GO:0004672; GO:0006468; GO:0030247	GO:0006468 - The process of introducing a phosphate group on to a protein.; GO:0004713 - Catalysis of the reaction: ATP + a protein tyrosine = ADP + protein tyrosine phosphate.; GO:0004672 - Catalysis of the phosphorylation of an amino acid residue in a protein, usually according to the reaction: a protein + ATP = a phosphoprotein + ADP.; GO:0005524 - Interacting selectively and non-covalently wi…	PWY-7409	PWY-7409 - ""
PAC:37912508	S. bicolor	Sobic.003G084200	0	Sobic.003G084200.1	Sobic.003G084200.1.p	PF14309; PF14383	PF14383 - DUF761-associated sequence motif; PF14309 - Domain of unknown function (DUF4378)	PTHR21726; PTHR21726:SF35	PTHR21726:SF35 - SUBFAMILY NOT NAMED; PTHR21726 - PHOSPHATIDYLINOSITOL N-ACETYLGLUCOSAMINYLTRANSFERASE SUBUNIT P DOWN SYNDROME CRITICAL REGION PROTEIN 5 -RELATED
PAC:37914654	S. bicolor	Sobic.003G104350	0	Sobic.003G104350.1	Sobic.003G104350.1.p	PF01073	PF01073 - 3-beta hydroxysteroid dehydrogenase/isomerase family	PTHR10366; PTHR10366:SF441	PTHR10366 - NAD DEPENDENT EPIMERASE/DEHYDRATASE; PTHR10366:SF441 - ISOFLAVONE REDUCTASE HOMOLOG P3-RELATED							GO:0003854; GO:0016616; GO:0055114; GO:0006694	GO:0006694 - The chemical reactions and pathways resulting in the formation of steroids, compounds with a 1,2,cyclopentanoperhydrophenanthrene nucleus; includes de novo formation and steroid interconversion by modification.; GO:0016616 - Catalysis of an oxidation-reduction (redox) reaction in which a CH-OH group acts as a hydrogen or electron donor and reduces NAD+ or NADP.; GO:0055114 - A metabo…				(1 of 2) PTHR10366:SF441 - ISOFLAVONE REDUCTASE HOMOLOG P3-RELATED
PAC:37913287	S. bicolor	Sobic.003G109832	0	Sobic.003G109832.1	Sobic.003G109832.1.p	PF00067	PF00067 - Cytochrome P450	PTHR24282; PTHR24282:SF49	PTHR24282:SF49 - SUBFAMILY NOT NAMED; PTHR24282 - CYTOCHROME P450 FAMILY MEMBER	KOG0157	KOG0157 - Cytochrome P450 CYP4/CYP19/CYP26 subfamilies	1.3.3.9	1.3.3.9 - Secologanin synthase			GO:0005506; GO:0016705; GO:0055114; GO:0004497; GO:0020037	GO:0020037 - Interacting selectively and non-covalently with heme, any compound of iron complexed in a porphyrin (tetrapyrrole) ring.; GO:0005506 - Interacting selectively and non-covalently with iron (Fe) ions.; GO:0004497 - Catalysis of the incorporation of one atom from molecular oxygen into a compound and the reduction of the other atom of oxygen to water.; GO:0016705 - Catalysis of an oxidat…				(1 of 4) PTHR24282//PTHR24282:SF49 - CYTOCHROME P450 FAMILY MEMBER // SUBFAMILY NOT NAMED
PAC:37914961	S. bicolor	Sobic.003G109900	0	Sobic.003G109900.1	Sobic.003G109900.1.p	PF13339; PF08164	PF08164 - Apoptosis-antagonizing transcription factor, C-terminal; PF13339 - Apoptosis antagonizing transcription factor	PTHR15565:SF0; PTHR15565	PTHR15565:SF0 - PROTEIN AATF; PTHR15565 - AATF PROTEIN APOPTOSIS ANTAGONIZING TRANSCRIPTION FACTOR					K14782	K14782 - ""	GO:0005634	GO:0005634 - A membrane-bounded organelle of eukaryotic cells in which chromosomes are housed and replicated. In most cells, the nucleus contains all of the cell's chromosomes except the organellar chromosomes, and is the site of RNA synthesis and processing. In some species, or in specialized cell types, RNA metabolism or DNA replication may be absent.
PAC:37913209	S. bicolor	Sobic.003G124200	0	Sobic.003G124200.1	Sobic.003G124200.1.p	PF02567	PF02567 - Phenazine biosynthesis-like protein	PTHR13774; PTHR13774:SF17	PTHR13774 - PHENAZINE BIOSYNTHESIS PROTEIN; PTHR13774:SF17 - PHENAZINE BIOSYNTHESIS-LIKE DOMAIN-CONTAINING PROTEIN	KOG3033	KOG3033 - Predicted PhzC/PhzF-type epimerase	5.3.3.17	5.3.3.17 - Trans-2,3-dihydro-3-hydroxyanthranilate isomerase			GO:0003824; GO:0009058	GO:0009058 - The chemical reactions and pathways resulting in the formation of substances; typically the energy-requiring part of metabolism in which simpler substances are transformed into more complex ones.; GO:0003824 - Catalysis of a biochemical reaction at physiological temperatures. In biologically catalyzed reactions, the reactants are known as substrates, and the catalysts are naturally o…
PAC:37916601	S. bicolor	Sobic.003G139900	0	Sobic.003G139900.2	Sobic.003G139900.2.p	PF03110	PF03110 - SBP domain	PTHR31251:SF27; PTHR31251	PTHR31251 - FAMILY NOT NAMED; PTHR31251:SF27 - SUBFAMILY NOT NAMED							GO:0003677; GO:0005634	GO:0005634 - A membrane-bounded organelle of eukaryotic cells in which chromosomes are housed and replicated. In most cells, the nucleus contains all of the cell's chromosomes except the organellar chromosomes, and is the site of RNA synthesis and processing. In some species, or in specialized cell types, RNA metabolism or DNA replication may be absent.; GO:0003677 - Any molecular function by whi…				(1 of 19) PF03110 - SBP domain (SBP)
PAC:37916224	S. bicolor	Sobic.003G178700	0	Sobic.003G178700.1	Sobic.003G178700.1.p	PF08541; PF08392	PF08392 - FAE1/Type III polyketide synthase-like protein; PF08541 - 3-Oxoacyl-[acyl-carrier-protein (ACP)] synthase III C terminal	PTHR31561; PTHR31561:SF9	PTHR31561 - FAMILY NOT NAMED; PTHR31561:SF9 - SUBFAMILY NOT NAMED			2.3.1.199	2.3.1.199 - Very-long-chain 3-oxoacyl-CoA synthase	K15397	K15397 - 3-ketoacyl-CoA synthase	GO:0016747; GO:0003824; GO:0016020; GO:0008152; GO:0008610; GO:0006633	GO:0008610 - The chemical reactions and pathways resulting in the formation of lipids, compounds soluble in an organic solvent but not, or sparingly, in an aqueous solvent.; GO:0016020 - A lipid bilayer along with all the proteins and protein complexes embedded in it an attached to it.; GO:0006633 - The chemical reactions and pathways resulting in the formation of a fatty acid, any of the aliphat…	PWY-5080; PWY-7601; PWY-6433; PWY-6598; PWY-7036; PWY-7619	PWY-5080 - ""; PWY-7601 - ""; PWY-7619 - ""; PWY-6598 - ""; PWY-6433 - ""; PWY-7036 - ""
PAC:37916918	S. bicolor	Sobic.003G195600	RSUG-MT.2	Sobic.003G195600.1	Sobic.003G195600.1.p	PF00010	PF00010 - Helix-loop-helix DNA-binding domain	PTHR12565:SF162; PTHR12565	PTHR12565 - STEROL REGULATORY ELEMENT-BINDING PROTEIN; PTHR12565:SF162 - SUBFAMILY NOT NAMED							GO:0046983	GO:0046983 - The formation of a protein dimer, a macromolecular structure consists of two noncovalently associated identical or nonidentical subunits.
PAC:37915749	S. bicolor	Sobic.003G203500	RSUG-MT.2	Sobic.003G203500.1	Sobic.003G203500.1.p	PF00171	PF00171 - Aldehyde dehydrogenase family	PTHR11699; PTHR11699:SF182	PTHR11699 - ALDEHYDE DEHYDROGENASE-RELATED; PTHR11699:SF182 - ALDEHYDE DEHYDROGENASE FAMILY 2 MEMBER C4			1.2.1.5	1.2.1.5 - Aldehyde dehydrogenase (NAD(P)(+))	K12355	K12355 - coniferyl-aldehyde dehydrogenase	GO:0016491; GO:0008152; GO:0055114; GO:0016620	GO:0016491 - Catalysis of an oxidation-reduction (redox) reaction, a reversible chemical reaction in which the oxidation state of an atom or atoms within a molecule is altered. One substrate acts as a hydrogen or electron donor and becomes oxidized, while the other acts as hydrogen or electron acceptor and becomes reduced.; GO:0016620 - Catalysis of an oxidation-reduction (redox) reaction in whic…	PWY66-21; PWY66-389; PWY-2724	PWY-2724 - ""; PWY66-389 - ""; PWY66-21 - ""
PAC:37912687	S. bicolor	Sobic.003G213000	RSUG-MT.2	Sobic.003G213000.1	Sobic.003G213000.1.p	PF03083	PF03083 - Sugar efflux transporter for intercellular exchange	PTHR10791:SF62; PTHR10791	PTHR10791 - RAG1-ACTIVATING PROTEIN 1; PTHR10791:SF62 - SUBFAMILY NOT NAMED	KOG1623	KOG1623 - Multitransmembrane protein			K15382	K15382 - ""
PAC:37914164	S. bicolor	Sobic.003G229700	RSUG-MT.2/SUCR-MT.2	Sobic.003G229700.1	Sobic.003G229700.1.p	PF01553	PF01553 - Acyltransferase	PTHR15486:SF24; PTHR15486	PTHR15486 - ANCIENT UBIQUITOUS PROTEIN; PTHR15486:SF24 - SUBFAMILY NOT NAMED			2.3.1.15	2.3.1.15 - Glycerol-3-phosphate 1-O-acyltransferase	K13508	K13508 - glycerol-3-phosphate acyltransferase	GO:0016746; GO:0008152	GO:0016746 - Catalysis of the transfer of an acyl group from one compound (donor) to another (acceptor).; GO:0008152 - The chemical reactions and pathways, including anabolism and catabolism, by which living organisms transform chemical substances. Metabolic processes typically transform small molecules, but also include macromolecular processes such as DNA repair and replication, and protein syn…	PWY4FS-7; PWY0-1319; PWY-7411; TRIGLSYN-PWY	TRIGLSYN-PWY - ""; PWY-7411 - ""; PWY4FS-7 - ""; PWY0-1319 - ""
PAC:37913473	S. bicolor	Sobic.003G393100	HGHT-MT.2/FBRT-MT.1	Sobic.003G393100.1	Sobic.003G393100.1.p	PF06470; PF02463; PF13476	PF13476 - AAA domain; PF02463 - RecF/RecN/SMC N terminal domain; PF06470 - SMC proteins Flexible Hinge Domain	PTHR18937; PTHR18937:SF9	PTHR18937:SF9 - STRUCTURAL MAINTENANCE OF CHROMOSOMES PROTEIN 2; PTHR18937 - STRUCTURAL MAINTENANCE OF CHROMOSOMES SMC FAMILY MEMBER					K06674	K06674 - structural maintenance of chromosome 2	GO:0005524; GO:0005515; GO:0007076; GO:0051276; GO:0005694; GO:0000796	GO:0007076 - The cell cycle process in which chromatin structure is compacted prior to and during mitosis in eukaryotic cells.; GO:0005515 - Interacting selectively and non-covalently with any protein or protein complex (a complex of two or more proteins that may include other nonprotein molecules).; GO:0005524 - Interacting selectively and non-covalently with ATP, adenosine 5'-triphosphate, a un…
PAC:37913787	S. bicolor	Sobic.003G397300	HGHT-MT.2/FBRT-MT.1	Sobic.003G397300.1	Sobic.003G397300.1.p
PAC:37915743	S. bicolor	Sobic.003G400200	HGHT-MT.2/FBRT-MT.1	Sobic.003G400200.1	Sobic.003G400200.1.p	PF04720	PF04720 - PDDEXK-like family of unknown function	PTHR31579; PTHR31579:SF9	PTHR31579:SF9 - SUBFAMILY NOT NAMED; PTHR31579 - FAMILY NOT NAMED
PAC:37915928	S. bicolor	Sobic.003G413201	HGHT-MT.2/FBRT-MT.1	Sobic.003G413201.1	Sobic.003G413201.1.p	PF08263; PF00069	PF08263 - Leucine rich repeat N-terminal domain; PF00069 - Protein kinase domain	PTHR27000; PTHR27000:SF58	PTHR27000:SF58 - SUBFAMILY NOT NAMED; PTHR27000 - FAMILY NOT NAMED	KOG1187	KOG1187 - Serine/threonine protein kinase	2.7.11.1	2.7.11.1 - Non-specific serine/threonine protein kinase			GO:0005524; GO:0004713; GO:0004672; GO:0006468	GO:0006468 - The process of introducing a phosphate group on to a protein.; GO:0004713 - Catalysis of the reaction: ATP + a protein tyrosine = ADP + protein tyrosine phosphate.; GO:0004672 - Catalysis of the phosphorylation of an amino acid residue in a protein, usually according to the reaction: a protein + ATP = a phosphoprotein + ADP.; GO:0005524 - Interacting selectively and non-covalently wi…				(1 of 13) PF00069//PF08263 - Protein kinase domain (Pkinase) // Leucine rich repeat N-terminal domain (LRRNT_2)
PAC:37918123	S. bicolor	Sobic.003G424400	HGHT-MT.2/FBRT-MT.1	Sobic.003G424400.1	Sobic.003G424400.1.p	PF00514	PF00514 - Armadillo/beta-catenin-like repeat	PTHR23315; PTHR23315:SF133	PTHR23315:SF133 - SUBFAMILY NOT NAMED; PTHR23315 - BETA CATENIN-RELATED ARMADILLO REPEAT-CONTAINING	KOG0166	KOG0166 - Karyopherin (importin) alpha			K08332	K08332 - vacuolar protein 8	GO:0005515; GO:0005488	GO:0005515 - Interacting selectively and non-covalently with any protein or protein complex (a complex of two or more proteins that may include other nonprotein molecules).; GO:0005488 - The selective, non-covalent, often stoichiometric, interaction of a molecule with one or more specific sites on another molecule.				(1 of 1) PTHR23315//PTHR23315:SF133 - BETA CATENIN-RELATED ARMADILLO REPEAT-CONTAINING // SUBFAMILY NOT NAMED
PAC:37916941	S. bicolor	Sobic.003G437400	0	Sobic.003G437400.1	Sobic.003G437400.1.p	PF00141	PF00141 - Peroxidase	PTHR31235; PTHR31235:SF66	PTHR31235:SF66 - SUBFAMILY NOT NAMED; PTHR31235 - FAMILY NOT NAMED			1.11.1.7	1.11.1.7 - Peroxidase	K00430	K00430 - peroxidase	GO:0004601; GO:0006979; GO:0055114; GO:0020037	GO:0020037 - Interacting selectively and non-covalently with heme, any compound of iron complexed in a porphyrin (tetrapyrrole) ring.; GO:0006979 - Any process that results in a change in state or activity of a cell or an organism (in terms of movement, secretion, enzyme production, gene expression, etc.) as a result of oxidative stress, a state often resulting from exposure to high levels of rea…	PWY-6824; PWY-5466; PWY-7214; PWY-7445	PWY-7445 - ""; PWY-7214 - ""; PWY-5466 - ""; PWY-6824 - ""
PAC:37913587	S. bicolor	Sobic.003G445900	0	Sobic.003G445900.1	Sobic.003G445900.1.p	PF12819; PF07714	PF07714 - Protein tyrosine kinase; PF12819 - Carbohydrate-binding protein of the ER	PTHR27003:SF112; PTHR27003	PTHR27003 - FAMILY NOT NAMED; PTHR27003:SF112 - SUBFAMILY NOT NAMED	KOG1187	KOG1187 - Serine/threonine protein kinase	2.7.11.1	2.7.11.1 - Non-specific serine/threonine protein kinase			GO:0005524; GO:0004713; GO:0004672; GO:0006468	GO:0006468 - The process of introducing a phosphate group on to a protein.; GO:0004713 - Catalysis of the reaction: ATP + a protein tyrosine = ADP + protein tyrosine phosphate.; GO:0004672 - Catalysis of the phosphorylation of an amino acid residue in a protein, usually according to the reaction: a protein + ATP = a phosphoprotein + ADP.; GO:0005524 - Interacting selectively and non-covalently wi…				(1 of 5) PF07714//PF12819 - Protein tyrosine kinase (Pkinase_Tyr) // Carbohydrate-binding protein of the ER (Malectin_like)
PAC:37931325	S. bicolor	Sobic.004G024400	RSUG-MT.3	Sobic.004G024400.1	Sobic.004G024400.1.p	PF00013	PF00013 - KH domain	PTHR10288:SF169; PTHR10288	PTHR10288 - KH DOMAIN CONTAINING RNA BINDING PROTEIN; PTHR10288:SF169 - SUBFAMILY NOT NAMED	KOG2190	KOG2190 - PolyC-binding proteins alphaCP-1 and related KH domain proteins			K13162	K13162 - ""	GO:0003676; GO:0003723	GO:0003723 - Interacting selectively and non-covalently with an RNA molecule or a portion thereof.; GO:0003676 - Interacting selectively and non-covalently with any nucleic acid.
PAC:37933454	S. bicolor	Sobic.004G036200	RSUG-MT.3	Sobic.004G036200.1	Sobic.004G036200.1.p	PF03492	PF03492 - SAM dependent carboxyl methyltransferase	PTHR31009; PTHR31009:SF16	PTHR31009:SF16 - SUBFAMILY NOT NAMED; PTHR31009 - S-ADENOSYL-L-METHIONINE:CARBOXYL METHYLTRANSFERASE FAMILY PROTEIN			2.1.1.273	2.1.1.273 - Benzoate O-methyltransferase			GO:0008168	GO:0008168 - Catalysis of the transfer of a methyl group to an acceptor molecule.	PWY-4203	PWY-4203 - ""		(1 of 6) 2.1.1.273 - Benzoate O-methyltransferase
PAC:37933030	S. bicolor	Sobic.004G037200	RSUG-MT.3	Sobic.004G037200.1	Sobic.004G037200.1.p	PF00432	PF00432 - Prenyltransferase and squalene oxidase repeat	PTHR11764:SF15; PTHR11764	PTHR11764 - LANOSTEROL SYNTHASE; PTHR11764:SF15 - CYCLOARTENOL SYNTHASE			5.4.99.8	5.4.99.8 - Cycloartenol synthase	K01853	K01853 - cycloartenol synthase	GO:0016866; GO:0003824	GO:0016866 - Catalysis of the transfer of a functional group from one position to another within a single molecule.; GO:0003824 - Catalysis of a biochemical reaction at physiological temperatures. In biologically catalyzed reactions, the reactants are known as substrates, and the catalysts are naturally occurring macromolecular substances known as enzymes. Enzymes possess specific binding sites f…	PWY-2541	PWY-2541 - ""
PAC:37932620	S. bicolor	Sobic.004G087500	0	Sobic.004G087500.1	Sobic.004G087500.1.p	PF03219	PF03219 - TLC ATP/ADP transporter	PTHR31187:SF3; PTHR31187	PTHR31187:SF3 - SUBFAMILY NOT NAMED; PTHR31187 - FAMILY NOT NAMED					K03301	K03301 - ""	GO:0005524; GO:0005471; GO:0016021; GO:0006810	GO:0016021 - The component of a membrane consisting of the gene products and protein complexes having at least some part of their peptide sequence embedded in the hydrophobic region of the membrane.; GO:0005471 - Catalysis of the reaction: ATP(out) + ADP(in) = ATP(in) + ADP(out).; GO:0005524 - Interacting selectively and non-covalently with ATP, adenosine 5'-triphosphate, a universally important …
PAC:37930847	S. bicolor	Sobic.004G109100	0	Sobic.004G109100.3	Sobic.004G109100.3.p	PF13639	PF13639 - Ring finger domain	PTHR14155:SF165; PTHR14155	PTHR14155 - RING FINGER DOMAIN-CONTAINING; PTHR14155:SF165 - SUBFAMILY NOT NAMED							GO:0008270; GO:0005515	GO:0005515 - Interacting selectively and non-covalently with any protein or protein complex (a complex of two or more proteins that may include other nonprotein molecules).; GO:0008270 - Interacting selectively and non-covalently with zinc (Zn) ions.				(1 of 5) PTHR14155//PTHR14155:SF165 - RING FINGER DOMAIN-CONTAINING // SUBFAMILY NOT NAMED
PAC:37929661	S. bicolor	Sobic.004G112100	0	Sobic.004G112100.1	Sobic.004G112100.1.p	PF01694	PF01694 - Rhomboid family	PTHR22936; PTHR22936:SF4	PTHR22936 - RHOMBOID-RELATED; PTHR22936:SF4 - RHOMBOID FAMILY PROTEIN	KOG2289	KOG2289 - Rhomboid family proteins	3.4.21.105	3.4.21.105 - Rhomboid protease			GO:0006508; GO:0016021; GO:0004252	GO:0006508 - The hydrolysis of proteins into smaller polypeptides and/or amino acids by cleavage of their peptide bonds.; GO:0016021 - The component of a membrane consisting of the gene products and protein complexes having at least some part of their peptide sequence embedded in the hydrophobic region of the membrane.; GO:0004252 - Catalysis of the hydrolysis of internal, alpha-peptide bonds in …				(1 of 1) PTHR22936:SF4 - RHOMBOID FAMILY PROTEIN
PAC:37931229	S. bicolor	Sobic.004G128600	0	Sobic.004G128600.1	Sobic.004G128600.1.p	PF05558	PF05558 - DREPP plasma membrane polypeptide	PTHR38522:SF2; PTHR38522	PTHR38522 - FAMILY NOT NAMED; PTHR38522:SF2 - SUBFAMILY NOT NAMED							GO:0042309; GO:0050825; GO:0051716; GO:0050826; GO:0046658	GO:0046658 - The component of the plasma membrane consisting of the gene products that are tethered to the membrane only by a covalently attached anchor, such as a lipid group, that is embedded in the membrane. Gene products with peptide sequences that are embedded in the membrane are excluded from this grouping.; GO:0050825 - Interacting selectively and non-covalently with ice, water reduced to …
PAC:37931175	S. bicolor	Sobic.004G143900	0	Sobic.004G143900.1	Sobic.004G143900.1.p	PF00218	PF00218 - Indole-3-glycerol phosphate synthase	PTHR22854; PTHR22854:SF13	PTHR22854:SF13 - SUBFAMILY NOT NAMED; PTHR22854 - TRYPTOPHAN BIOSYNTHESIS PROTEIN	KOG4201	KOG4201 - Anthranilate synthase component II	4.1.1.48	4.1.1.48 - Indole-3-glycerol-phosphate synthase	K01609	K01609 - indole-3-glycerol phosphate synthase	GO:0004425; GO:0003824; GO:0008152	GO:0003824 - Catalysis of a biochemical reaction at physiological temperatures. In biologically catalyzed reactions, the reactants are known as substrates, and the catalysts are naturally occurring macromolecular substances known as enzymes. Enzymes possess specific binding sites for substrates, and are usually composed wholly or largely of protein, but RNA that has catalytic activity (ribozyme) …	TRPSYN-PWY	TRPSYN-PWY - ""
PAC:37932088	S. bicolor	Sobic.004G148600	0	Sobic.004G148600.1	Sobic.004G148600.1.p	PF07719; PF12796; PF13414	PF13414 - TPR repeat; PF12796 - Ankyrin repeats (3 copies); PF07719 - Tetratricopeptide repeat	PTHR22904; PTHR22904:SF361	PTHR22904 - TPR REPEAT CONTAINING PROTEIN; PTHR22904:SF361 - SUBFAMILY NOT NAMED	KOG0508; KOG4412	KOG4412 - 26S proteasome regulatory complex, subunit PSMD10; KOG0508 - Ankyrin repeat protein					GO:0005515	GO:0005515 - Interacting selectively and non-covalently with any protein or protein complex (a complex of two or more proteins that may include other nonprotein molecules).				(1 of 5) PTHR22904//PTHR22904:SF361 - TPR REPEAT CONTAINING PROTEIN // SUBFAMILY NOT NAMED
PAC:37932468	S. bicolor	Sobic.004G159100	0	Sobic.004G159100.1	Sobic.004G159100.1.p	PF03016	PF03016 - Exostosin family	PTHR11062; PTHR11062:SF85	PTHR11062 - EXOSTOSIN HEPARAN SULFATE GLYCOSYLTRANSFERASE -RELATED; PTHR11062:SF85 - SUBFAMILY NOT NAMED	KOG1021	KOG1021 - Acetylglucosaminyltransferase EXT1/exostosin 1	2.4.2.41	2.4.2.41 - Xylogalacturonan beta-1,3-xylosyltransferase					PWY-5980	PWY-5980 - ""
PAC:37930011	S. bicolor	Sobic.004G167300	0	Sobic.004G167300.1	Sobic.004G167300.1.p			PTHR33736; PTHR33736:SF4	PTHR33736:SF4 - SUBFAMILY NOT NAMED; PTHR33736 - FAMILY NOT NAMED							GO:0005515	GO:0005515 - Interacting selectively and non-covalently with any protein or protein complex (a complex of two or more proteins that may include other nonprotein molecules).
PAC:37933214	S. bicolor	Sobic.004G296300	0	Sobic.004G296300.1	Sobic.004G296300.1.p	PF13906	PF13906 - C-terminus of AA_permease	PTHR11785; PTHR11785:SF407	PTHR11785:SF407 - CATIONIC AMINO ACID TRANSPORTER 9, CHLOROPLASTIC; PTHR11785 - AMINO ACID TRANSPORTER	KOG1286	KOG1286 - Amino acid transporters			K03294	K03294 - ""	GO:0016020; GO:0015171; GO:0003333	GO:0016020 - A lipid bilayer along with all the proteins and protein complexes embedded in it an attached to it.; GO:0015171 - Enables the transfer of amino acids from one side of a membrane to the other. Amino acids are organic molecules that contain an amino group and a carboxyl group.; GO:0003333 - The directed movement of amino acids, organic acids containing one or more amino substituents ac…
PAC:37930679	S. bicolor	Sobic.004G297600	0	Sobic.004G297600.1	Sobic.004G297600.1.p	PF01764	PF01764 - Lipase (class 3)	PTHR31403; PTHR31403:SF14	PTHR31403 - FAMILY NOT NAMED; PTHR31403:SF14 - SUBFAMILY NOT NAMED	KOG4569	KOG4569 - Predicted lipase	3.1.1.32	3.1.1.32 - Phospholipase A(1)			GO:0006629	GO:0006629 - The chemical reactions and pathways involving lipids, compounds soluble in an organic solvent but not, or sparingly, in an aqueous solvent. Includes fatty acids; neutral fats, other fatty-acid esters, and soaps; long-chain (fatty) alcohols and waxes; sphingoids and other long-chain bases; glycolipids, phospholipids and sphingolipids; and carotenes, polyprenols, sterols, terpenes and …	LIPASYN-PWY; PWY-6803	PWY-6803 - ""; LIPASYN-PWY - ""
PAC:37933674	S. bicolor	Sobic.004G299300	0	Sobic.004G299300.1	Sobic.004G299300.1.p	PF00069; PF07714	PF00069 - Protein kinase domain; PF07714 - Protein tyrosine kinase	PTHR27001; PTHR27001:SF228	PTHR27001 - FAMILY NOT NAMED; PTHR27001:SF228 - SUBFAMILY NOT NAMED	KOG1187; KOG2345	KOG2345 - Serine/threonine protein kinase/TGF-beta stimulated factor; KOG1187 - Serine/threonine protein kinase	2.7.11.1	2.7.11.1 - Non-specific serine/threonine protein kinase			GO:0005524; GO:0004713; GO:0004672; GO:0006468	GO:0006468 - The process of introducing a phosphate group on to a protein.; GO:0004713 - Catalysis of the reaction: ATP + a protein tyrosine = ADP + protein tyrosine phosphate.; GO:0004672 - Catalysis of the phosphorylation of an amino acid residue in a protein, usually according to the reaction: a protein + ATP = a phosphoprotein + ADP.; GO:0005524 - Interacting selectively and non-covalently wi…
PAC:37933924	S. bicolor	Sobic.004G310100	0	Sobic.004G310100.1	Sobic.004G310100.1.p	PF03171; PF14226	PF14226 - non-haem dioxygenase in morphine synthesis N-terminal; PF03171 - 2OG-Fe(II) oxygenase superfamily	PTHR10209; PTHR10209:SF165	PTHR10209:SF165 - FLAVONOL SYNTHASE 3-RELATED; PTHR10209 - OXIDOREDUCTASE, 2OG-FE II OXYGENASE FAMILY PROTEIN	KOG0143	KOG0143 - Iron/ascorbate family oxidoreductases	1.14.11.23	1.14.11.23 - Flavonol synthase	K05278	K05278 - flavonol synthase	GO:0016491; GO:0005506; GO:0055114	GO:0016491 - Catalysis of an oxidation-reduction (redox) reaction, a reversible chemical reaction in which the oxidation state of an atom or atoms within a molecule is altered. One substrate acts as a hydrogen or electron donor and becomes oxidized, while the other acts as hydrogen or electron acceptor and becomes reduced.; GO:0005506 - Interacting selectively and non-covalently with iron (Fe) io…	PWY-6787; PWY-3101; PWY-5390; PWY-5391	PWY-3101 - ""; PWY-6787 - ""; PWY-5390 - ""; PWY-5391 - ""
PAC:37933224	S. bicolor	Sobic.004G323800	0	Sobic.004G323800.1	Sobic.004G323800.1.p	PF03462; PF00472	PF00472 - RF-1 domain; PF03462 - PCRF domain	PTHR11075:SF6; PTHR11075	PTHR11075:SF6 - CLASS I PEPTIDE CHAIN RELEASE FACTOR; PTHR11075 - PEPTIDE CHAIN RELEASE FACTOR	KOG2726	KOG2726 - Mitochondrial polypeptide chain release factor			K02836	K02836 - ""	GO:0006415; GO:0005737; GO:0003747; GO:0016149	GO:0003747 - Involved in catalyzing the release of a nascent polypeptide chain from a ribosome.; GO:0016149 - A translation release factor that is specific for one or more particular termination codons; acts at the ribosomal A-site and require polypeptidyl-tRNA at the P-site.; GO:0005737 - All of the contents of a cell excluding the plasma membrane and nucleus, but including other subcellular str…
PAC:37931680	S. bicolor	Sobic.004G347500	0	Sobic.004G347500.2	Sobic.004G347500.2.p	PF13671	PF13671 - AAA domain	PTHR33477; PTHR33477:SF1	PTHR33477 - FAMILY NOT NAMED; PTHR33477:SF1 - SUBFAMILY NOT NAMED
PAC:37930454	S. bicolor	Sobic.004G351100	0	Sobic.004G351100.1	Sobic.004G351100.1.p	PF04258; PF02225	PF02225 - PA domain; PF04258 - Signal peptide peptidase	PTHR12174; PTHR12174:SF45	PTHR12174:SF45 - SUBFAMILY NOT NAMED; PTHR12174 - SIGNAL PEPTIDE PEPTIDASE			3.4.11.6; 3.4.11.10	3.4.11.10 - Bacterial leucyl aminopeptidase; 3.4.11.6 - Aminopeptidase B	K09597	K09597 - ""	GO:0004190; GO:0016021	GO:0016021 - The component of a membrane consisting of the gene products and protein complexes having at least some part of their peptide sequence embedded in the hydrophobic region of the membrane.; GO:0004190 - Catalysis of the hydrolysis of internal, alpha-peptide bonds in a polypeptide chain by a mechanism in which a water molecule bound by the side chains of aspartic residues at the active c…
PAC:37924955	S. bicolor	Sobic.005G033100	0	Sobic.005G033100.1	Sobic.005G033100.1.p	PF00501	PF00501 - AMP-binding enzyme	PTHR24096:SF221; PTHR24096	PTHR24096 - FAMILY NOT NAMED; PTHR24096:SF221 - PROTEIN ACS-13, ISOFORM C			6.2.1.3	6.2.1.3 - Long-chain-fatty-acid--CoA ligase	K01897	K01897 - long-chain acyl-CoA synthetase	GO:0003824; GO:0008152	GO:0003824 - Catalysis of a biochemical reaction at physiological temperatures. In biologically catalyzed reactions, the reactants are known as substrates, and the catalysts are naturally occurring macromolecular substances known as enzymes. Enzymes possess specific binding sites for substrates, and are usually composed wholly or largely of protein, but RNA that has catalytic activity (ribozyme) …	PWY-5989; PWY-6803; PWY-6733; PWY-321; PWY-5136; PWY-5147; PWY-5885; PWY-5156; PWY-561; PWY-1121; PWY-5971; PWY-5143; PWY66-389	PWY-6803 - ""; PWY-1121 - ""; PWY-5136 - ""; PWY-321 - ""; PWY66-389 - ""; PWY-5971 - ""; PWY-561 - ""; PWY-5147 - ""; PWY-5989 - ""; PWY-5156 - ""; PWY-5885 - ""; PWY-5143 - ""; PWY-6733 - ""
PAC:37923917	S. bicolor	Sobic.005G033801	0	Sobic.005G033801.1	Sobic.005G033801.1.p	PF00201	PF00201 - UDP-glucoronosyl and UDP-glucosyl transferase	PTHR11926; PTHR11926:SF231	PTHR11926:SF231 - SUBFAMILY NOT NAMED; PTHR11926 - GLUCOSYL/GLUCURONOSYL TRANSFERASES			2.4.1.115	2.4.1.115 - Anthocyanidin 3-O-glucosyltransferase			GO:0016758; GO:0008152	GO:0016758 - Catalysis of the transfer of a hexosyl group from one compound (donor) to another (acceptor).; GO:0008152 - The chemical reactions and pathways, including anabolism and catabolism, by which living organisms transform chemical substances. Metabolic processes typically transform small molecules, but also include macromolecular processes such as DNA repair and replication, and protein s…	PWY-5125; PWY-7267; PWY-5153	PWY-7267 - ""; PWY-5153 - ""; PWY-5125 - ""
PAC:37924501	S. bicolor	Sobic.005G036000	0	Sobic.005G036000.1	Sobic.005G036000.1.p	PF01190	PF01190 - Pollen proteins Ole e I like	PTHR33210:SF1; PTHR33210	PTHR33210:SF1 - SUBFAMILY NOT NAMED; PTHR33210 - FAMILY NOT NAMED
PAC:37924418	S. bicolor	Sobic.005G038500	0	Sobic.005G038500.1	Sobic.005G038500.1.p	PF13041	PF13041 - PPR repeat family	PTHR24015:SF724; PTHR24015	PTHR24015 - FAMILY NOT NAMED; PTHR24015:SF724 - SUBFAMILY NOT NAMED							GO:0005515	GO:0005515 - Interacting selectively and non-covalently with any protein or protein complex (a complex of two or more proteins that may include other nonprotein molecules).
PAC:37924698	S. bicolor	Sobic.005G052000	0	Sobic.005G052000.1	Sobic.005G052000.1.p	PF00069	PF00069 - Protein kinase domain	PTHR27001:SF103; PTHR27001	PTHR27001 - FAMILY NOT NAMED; PTHR27001:SF103 - SUBFAMILY NOT NAMED	KOG1187	KOG1187 - Serine/threonine protein kinase	2.7.11.1	2.7.11.1 - Non-specific serine/threonine protein kinase	K04730	K04730 - interleukin-1 receptor-associated kinase 1	GO:0005524; GO:0004713; GO:0004672; GO:0006468	GO:0006468 - The process of introducing a phosphate group on to a protein.; GO:0004713 - Catalysis of the reaction: ATP + a protein tyrosine = ADP + protein tyrosine phosphate.; GO:0004672 - Catalysis of the phosphorylation of an amino acid residue in a protein, usually according to the reaction: a protein + ATP = a phosphoprotein + ADP.; GO:0005524 - Interacting selectively and non-covalently wi…				(1 of 26) K04730 - interleukin-1 receptor-associated kinase 1 (IRAK1)
PAC:37923545	S. bicolor	Sobic.005G057700	0	Sobic.005G057700.1	Sobic.005G057700.1.p	PF13855; PF08263; PF00069	PF08263 - Leucine rich repeat N-terminal domain; PF00069 - Protein kinase domain; PF13855 - Leucine rich repeat	PTHR27000; PTHR27000:SF116	PTHR27000:SF116 - SUBFAMILY NOT NAMED; PTHR27000 - FAMILY NOT NAMED	KOG1187	KOG1187 - Serine/threonine protein kinase	2.7.11.1	2.7.11.1 - Non-specific serine/threonine protein kinase			GO:0005524; GO:0005515; GO:0004672; GO:0006468	GO:0006468 - The process of introducing a phosphate group on to a protein.; GO:0004672 - Catalysis of the phosphorylation of an amino acid residue in a protein, usually according to the reaction: a protein + ATP = a phosphoprotein + ADP.; GO:0005515 - Interacting selectively and non-covalently with any protein or protein complex (a complex of two or more proteins that may include other nonprotein…
PAC:37924333	S. bicolor	Sobic.005G062700	0	Sobic.005G062700.1	Sobic.005G062700.1.p	PF01106	PF01106 - NifU-like domain	PTHR31942; PTHR31942:SF30	PTHR31942 - FAMILY NOT NAMED; PTHR31942:SF30 - SUBFAMILY NOT NAMED							GO:0005506; GO:0051536; GO:0016226	GO:0051536 - Interacting selectively and non-covalently with an iron-sulfur cluster, a combination of iron and sulfur atoms.; GO:0005506 - Interacting selectively and non-covalently with iron (Fe) ions.; GO:0016226 - The incorporation of iron and exogenous sulfur into a metallo-sulfur cluster.
PAC:37924647	S. bicolor	Sobic.005G064600	0	Sobic.005G064600.2	Sobic.005G064600.2.p	PF02365	PF02365 - No apical meristem (NAM) protein	PTHR31719:SF30; PTHR31719	PTHR31719:SF30 - SUBFAMILY NOT NAMED; PTHR31719 - FAMILY NOT NAMED							GO:0003677; GO:0006355	GO:0003677 - Any molecular function by which a gene product interacts selectively and non-covalently with DNA (deoxyribonucleic acid).; GO:0006355 - Any process that modulates the frequency, rate or extent of cellular DNA-templated transcription.				(1 of 130) PF02365 - No apical meristem (NAM) protein (NAM)
PAC:37922778	S. bicolor	Sobic.005G082100	0	Sobic.005G082100.1	Sobic.005G082100.1.p	PF01095; PF04043	PF04043 - Plant invertase/pectin methylesterase inhibitor; PF01095 - Pectinesterase	PTHR31707; PTHR31707:SF29	PTHR31707:SF29 - PECTINESTERASE/PECTINESTERASE INHIBITOR 16-RELATED; PTHR31707 - FAMILY NOT NAMED			3.1.1.11	3.1.1.11 - Pectinesterase			GO:0004857; GO:0005618; GO:0042545; GO:0030599	GO:0004857 - Binds to and stops, prevents or reduces the activity of an enzyme.; GO:0042545 - The series of events leading to chemical and structural alterations of an existing cell wall that can result in loosening, increased extensibility or disassembly.; GO:0005618 - The rigid or semi-rigid envelope lying outside the cell membrane of plant, fungal, most prokaryotic cells and some protozoan par…	PWY-1081	PWY-1081 - ""
PAC:37925312	S. bicolor	Sobic.005G084300	0	Sobic.005G084300.1	Sobic.005G084300.1.p	PF00704	PF00704 - Glycosyl hydrolases family 18	PTHR11177:SF163; PTHR11177	PTHR11177 - CHITINASE; PTHR11177:SF163 - SUBFAMILY NOT NAMED			3.2.1.14	3.2.1.14 - Chitinase			GO:0005975; GO:0004553	GO:0004553 - Catalysis of the hydrolysis of any O-glycosyl bond.; GO:0005975 - The chemical reactions and pathways involving carbohydrates, any of a group of organic compounds based of the general formula Cx(H2O)y. Includes the formation of carbohydrate derivatives by the addition of a carbohydrate residue to another molecule.	PWY-6902	PWY-6902 - ""
PAC:37924575	S. bicolor	Sobic.005G087400	0	Sobic.005G087400.3	Sobic.005G087400.3.p	PF06964	PF06964 - Alpha-L-arabinofuranosidase C-terminus	PTHR31776; PTHR31776:SF0	PTHR31776 - FAMILY NOT NAMED; PTHR31776:SF0 - ALPHA-L-ARABINOFURANOSIDASE 1-RELATED			3.2.1.55	3.2.1.55 - Non-reducing end alpha-L-arabinofuranosidase	K01209	K01209 - alpha-N-arabinofuranosidase	GO:0005975; GO:0046373; GO:0046556	GO:0046556 - Catalysis of the hydrolysis of terminal non-reducing alpha-L-arabinofuranoside residues in alpha-L-arabinosides.; GO:0005975 - The chemical reactions and pathways involving carbohydrates, any of a group of organic compounds based of the general formula Cx(H2O)y. Includes the formation of carbohydrate derivatives by the addition of a carbohydrate residue to another molecule.; GO:00463…				(1 of 6) K01209 - alpha-N-arabinofuranosidase (E3.2.1.55, abfA)
PAC:37925041	S. bicolor	Sobic.005G093800	0	Sobic.005G093800.1	Sobic.005G093800.1.p	PF00931	PF00931 - NB-ARC domain	PTHR23155; PTHR23155:SF624	PTHR23155:SF624 - SUBFAMILY NOT NAMED; PTHR23155 - LEUCINE-RICH REPEAT-CONTAINING PROTEIN	KOG4658	KOG4658 - Apoptotic ATPase			K13457	K13457 - disease resistance protein RPM1	GO:0043531	GO:0043531 - Interacting selectively and non-covalently with ADP, adenosine 5'-diphosphate.				(1 of 7) PTHR23155//PTHR23155:SF624 - LEUCINE-RICH REPEAT-CONTAINING PROTEIN // SUBFAMILY NOT NAMED
PAC:37923484	S. bicolor	Sobic.005G094001	0	Sobic.005G094001.1	Sobic.005G094001.1.p	PF00931	PF00931 - NB-ARC domain	PTHR23155:SF618; PTHR23155	PTHR23155:SF618 - SUBFAMILY NOT NAMED; PTHR23155 - LEUCINE-RICH REPEAT-CONTAINING PROTEIN	KOG4658	KOG4658 - Apoptotic ATPase					GO:0043531	GO:0043531 - Interacting selectively and non-covalently with ADP, adenosine 5'-diphosphate.
PAC:37925303	S. bicolor	Sobic.005G103200	0	Sobic.005G103200.2	Sobic.005G103200.2.p
PAC:37923796	S. bicolor	Sobic.005G137400	0	Sobic.005G137400.1	Sobic.005G137400.1.p
PAC:37924061	S. bicolor	Sobic.005G165500	0	Sobic.005G165500.1	Sobic.005G165500.1.p	PF00082; PF05922	PF00082 - Subtilase family; PF05922 - Peptidase inhibitor I9	PTHR10795:SF377; PTHR10795	PTHR10795 - PROPROTEIN CONVERTASE SUBTILISIN/KEXIN; PTHR10795:SF377 - SUBFAMILY NOT NAMED			3.4.14.10	3.4.14.10 - Tripeptidyl-peptidase II			GO:0006508; GO:0004252	GO:0006508 - The hydrolysis of proteins into smaller polypeptides and/or amino acids by cleavage of their peptide bonds.; GO:0004252 - Catalysis of the hydrolysis of internal, alpha-peptide bonds in a polypeptide chain by a catalytic mechanism that involves a catalytic triad consisting of a serine nucleophile that is activated by a proton relay involving an acidic residue (e.g. aspartate or gluta…
PAC:37923690	S. bicolor	Sobic.005G169200	0	Sobic.005G169200.1	Sobic.005G169200.1.p	PF00967	PF00967 - Barwin family	PTHR22595:SF1; PTHR22595	PTHR22595:SF1 - SUBFAMILY NOT NAMED; PTHR22595 - CHITINASE-RELATED							GO:0050832; GO:0042742	GO:0050832 - Reactions triggered in response to the presence of a fungus that act to protect the cell or organism.; GO:0042742 - Reactions triggered in response to the presence of a bacterium that act to protect the cell or organism.
PAC:37924789	S. bicolor	Sobic.005G169400	0	Sobic.005G169400.1	Sobic.005G169400.1.p	PF00967	PF00967 - Barwin family	PTHR22595; PTHR22595:SF48	PTHR22595:SF48 - SUBFAMILY NOT NAMED; PTHR22595 - CHITINASE-RELATED							GO:0050832; GO:0042742	GO:0050832 - Reactions triggered in response to the presence of a fungus that act to protect the cell or organism.; GO:0042742 - Reactions triggered in response to the presence of a bacterium that act to protect the cell or organism.
PAC:37923558	S. bicolor	Sobic.005G182200	0	Sobic.005G182200.2	Sobic.005G182200.2.p	PF00931	PF00931 - NB-ARC domain	PTHR23155:SF495; PTHR23155	PTHR23155 - LEUCINE-RICH REPEAT-CONTAINING PROTEIN; PTHR23155:SF495 - SUBFAMILY NOT NAMED					K13457	K13457 - disease resistance protein RPM1	GO:0043531	GO:0043531 - Interacting selectively and non-covalently with ADP, adenosine 5'-diphosphate.				(1 of 2) PTHR23155//PTHR23155:SF495 - LEUCINE-RICH REPEAT-CONTAINING PROTEIN // SUBFAMILY NOT NAMED
PAC:37924988	S. bicolor	Sobic.005G183900	0	Sobic.005G183900.1	Sobic.005G183900.1.p	PF01061; PF08370; PF14510; PF00005	PF08370 - Plant PDR ABC transporter associated; PF14510 - ABC-transporter extracellular N-terminal; PF00005 - ABC transporter; PF01061 - ABC-2 type transporter	PTHR19241; PTHR19241:SF219	PTHR19241 - ATP-BINDING CASSETTE TRANSPORTER; PTHR19241:SF219 - ABC TRANSPORTER G FAMILY MEMBER 38			3.6.3.25; 3.6.3.19	3.6.3.19 - Maltose-transporting ATPase; 3.6.3.25 - Sulfate-transporting ATPase			GO:0016887; GO:0005524; GO:0016020	GO:0016020 - A lipid bilayer along with all the proteins and protein complexes embedded in it an attached to it.; GO:0005524 - Interacting selectively and non-covalently with ATP, adenosine 5'-triphosphate, a universally important coenzyme and enzyme regulator.; GO:0016887 - Catalysis of the reaction: ATP + H2O = ADP + phosphate + 2 H+. May or may not be coupled to another reaction.
PAC:37946660	S. bicolor	Sobic.006G050500	0	Sobic.006G050500.2	Sobic.006G050500.2.p	PF00463	PF00463 - Isocitrate lyase family	PTHR21631; PTHR21631:SF21	PTHR21631:SF21 - SUBFAMILY NOT NAMED; PTHR21631 - ISOCITRATE LYASE/MALATE SYNTHASE			4.1.3.32	4.1.3.32 - 2,3-dimethylmalate lyase			GO:0003824; GO:0019752; GO:0004451	GO:0019752 - The chemical reactions and pathways involving carboxylic acids, any organic acid containing one or more carboxyl (COOH) groups or anions (COO-).; GO:0003824 - Catalysis of a biochemical reaction at physiological temperatures. In biologically catalyzed reactions, the reactants are known as substrates, and the catalysts are naturally occurring macromolecular substances known as enzymes…				(1 of 2) 4.1.3.32 - 2,3-dimethylmalate lyase / (2R,3S)-2,3-dimethylmalate pyruvate-lyase
PAC:37947520	S. bicolor	Sobic.006G076000	BRIX-MT.3/HGHT-MT.3/FBRT-MT.2/SUCR-MT.3/FBMS-MT.2/JYLD-MT.2	Sobic.006G076000.1	Sobic.006G076000.1.p
PAC:37949078	S. bicolor	Sobic.006G098200	BRIX-MT.3/FBRT-MT.2/SUCR-MT.3/FBMS-MT.2/JYLD-MT.2	Sobic.006G098200.1	Sobic.006G098200.1.p			PTHR31133; PTHR31133:SF4	PTHR31133 - FAMILY NOT NAMED; PTHR31133:SF4 - SUBFAMILY NOT NAMED
PAC:37948190	S. bicolor	Sobic.006G121200	FBRT-MT.2/JYLD-MT.2/BRIX-MT.4/SUCR-MT.4	Sobic.006G121200.1	Sobic.006G121200.1.p	PF16974	PF16974 - High-affinity nitrate transporter accessory	PTHR34806; PTHR34806:SF2	PTHR34806 - FAMILY NOT NAMED; PTHR34806:SF2 - SUBFAMILY NOT NAMED							GO:0015706; GO:0010167	GO:0010167 - Any process that results in a change in state or activity of a cell or an organism (in terms of movement, secretion, enzyme production, gene expression, etc.) as a result of a nitrate stimulus.; GO:0015706 - The directed movement of nitrate into, out of or within a cell, or between cells, by means of some agent such as a transporter or pore.
PAC:37949125	S. bicolor	Sobic.006G123000	FBRT-MT.2/JYLD-MT.2/BRIX-MT.4/SUCR-MT.4	Sobic.006G123000.1	Sobic.006G123000.1.p	PF00400	PF00400 - WD domain, G-beta repeat	PTHR22844; PTHR22844:SF199	PTHR22844:SF199 - F21J9.19; PTHR22844 - F-BOX AND WD40 DOMAIN PROTEIN	KOG0313	KOG0313 - Microtubule binding protein YTM1 (contains WD40 repeats)	2.7.11.7	2.7.11.7 - [Myosin heavy-chain] kinase			GO:0005515	GO:0005515 - Interacting selectively and non-covalently with any protein or protein complex (a complex of two or more proteins that may include other nonprotein molecules).
PAC:37949367	S. bicolor	Sobic.006G128200	FBRT-MT.2/JYLD-MT.2/BRIX-MT.4/SUCR-MT.4	Sobic.006G128200.1	Sobic.006G128200.1.p	PF00069	PF00069 - Protein kinase domain	PTHR24351; PTHR24351:SF69	PTHR24351:SF69 - AGC (CAMP-DEPENDENT, CGMP-DEPENDENT AND PROTEIN KINASE C) KINASE FAMILY PROTEIN-RELATED; PTHR24351 - RIBOSOMAL PROTEIN S6 KINASE	KOG0610	KOG0610 - Putative serine/threonine protein kinase	2.7.11.1	2.7.11.1 - Non-specific serine/threonine protein kinase			GO:0005524; GO:0004713; GO:0004672; GO:0006468; GO:0004674	GO:0006468 - The process of introducing a phosphate group on to a protein.; GO:0004713 - Catalysis of the reaction: ATP + a protein tyrosine = ADP + protein tyrosine phosphate.; GO:0004672 - Catalysis of the phosphorylation of an amino acid residue in a protein, usually according to the reaction: a protein + ATP = a phosphoprotein + ADP.; GO:0005524 - Interacting selectively and non-covalently wi…
PAC:37948977	S. bicolor	Sobic.006G142500	FBRT-MT.2/JYLD-MT.2/BRIX-MT.4/SUCR-MT.4	Sobic.006G142500.2	Sobic.006G142500.2.p	PF07714	PF07714 - Protein tyrosine kinase	PTHR27001; PTHR27001:SF97	PTHR27001 - FAMILY NOT NAMED; PTHR27001:SF97 - SUBFAMILY NOT NAMED	KOG1187	KOG1187 - Serine/threonine protein kinase	2.7.11.1	2.7.11.1 - Non-specific serine/threonine protein kinase			GO:0005524; GO:0004672; GO:0006468	GO:0006468 - The process of introducing a phosphate group on to a protein.; GO:0004672 - Catalysis of the phosphorylation of an amino acid residue in a protein, usually according to the reaction: a protein + ATP = a phosphoprotein + ADP.; GO:0005524 - Interacting selectively and non-covalently with ATP, adenosine 5'-triphosphate, a universally important coenzyme and enzyme regulator.				(1 of 1200) 2.7.11.1 - Non-specific serine/threonine protein kinase / Threonine-specific protein kinase
PAC:37945819	S. bicolor	Sobic.006G164300	FBRT-MT.2/BRIX-MT.4/SUCR-MT.4	Sobic.006G164300.1	Sobic.006G164300.1.p	PF03169	PF03169 - OPT oligopeptide transporter protein	PTHR31645; PTHR31645:SF19	PTHR31645:SF19 - SUBFAMILY NOT NAMED; PTHR31645 - FAMILY NOT NAMED							GO:0055085	GO:0055085 - The process in which a solute is transported across a lipid bilayer, from one side of a membrane to the other
PAC:37946524	S. bicolor	Sobic.006G176600	BRIX-MT.4/SUCR-MT.4	Sobic.006G176600.1	Sobic.006G176600.1.p	PF01063	PF01063 - Amino-transferase class IV	PTHR11825; PTHR11825:SF41	PTHR11825:SF41 - SUBFAMILY NOT NAMED; PTHR11825 - SUBGROUP IIII AMINOTRANSFERASE	KOG0975	KOG0975 - Branched chain aminotransferase BCAT1, pyridoxal phosphate enzymes type IV superfamily	2.6.1.42	2.6.1.42 - Branched-chain-amino-acid transaminase	K00826	K00826 - branched-chain amino acid aminotransferase	GO:0003824; GO:0008152; GO:0004084; GO:0009081	GO:0004084 - Catalysis of the reaction: a branched-chain amino acid + 2-oxoglutarate = L-glutamate + a 2-oxocarboxylate derived from the branched-chain amino acid.; GO:0009081 - The chemical reactions and pathways involving amino acids containing a branched carbon skeleton, comprising isoleucine, leucine and valine.; GO:0003824 - Catalysis of a biochemical reaction at physiological temperatures. …	VALDEG-PWY; PWY-3001; ILEUSYN-PWY; LEU-DEG2-PWY; ILEUDEG-PWY; VALSYN-PWY; LEUSYN-PWY; BRANCHED-CHAIN-AA-SYN-PWY	LEUSYN-PWY - ""; VALDEG-PWY - ""; ILEUSYN-PWY - ""; LEU-DEG2-PWY - ""; VALSYN-PWY - ""; ILEUDEG-PWY - ""; PWY-3001 - ""; BRANCHED-CHAIN-AA-SYN-PWY - ""		(1 of 1) PTHR11825//PTHR11825:SF41 - SUBGROUP IIII AMINOTRANSFERASE // SUBFAMILY NOT NAMED
PAC:37947349	S. bicolor	Sobic.006G177000	BRIX-MT.4/SUCR-MT.4	Sobic.006G177000.1	Sobic.006G177000.1.p	PF00067	PF00067 - Cytochrome P450	PTHR24296; PTHR24296:SF16	PTHR24296:SF16 - SUBFAMILY NOT NAMED; PTHR24296 - FAMILY NOT NAMED	KOG0157	KOG0157 - Cytochrome P450 CYP4/CYP19/CYP26 subfamilies	1.14.14.1	1.14.14.1 - Unspecific monooxygenase	K15398	K15398 - fatty acid omega-hydroxylase	GO:0005506; GO:0016705; GO:0055114; GO:0004497; GO:0020037	GO:0020037 - Interacting selectively and non-covalently with heme, any compound of iron complexed in a porphyrin (tetrapyrrole) ring.; GO:0005506 - Interacting selectively and non-covalently with iron (Fe) ions.; GO:0004497 - Catalysis of the incorporation of one atom from molecular oxygen into a compound and the reduction of the other atom of oxygen to water.; GO:0016705 - Catalysis of an oxidat…
PAC:37948091	S. bicolor	Sobic.006G177800	BRIX-MT.4/SUCR-MT.4	Sobic.006G177800.1	Sobic.006G177800.1.p	PF00326; PF02897	PF02897 - Prolyl oligopeptidase, N-terminal beta-propeller domain; PF00326 - Prolyl oligopeptidase family	PTHR11757; PTHR11757:SF8	PTHR11757 - PROTEASE FAMILY S9A OLIGOPEPTIDASE; PTHR11757:SF8 - SUBFAMILY NOT NAMED			3.4.21.26	3.4.21.26 - Prolyl oligopeptidase	K01322	K01322 - ""	GO:0006508; GO:0004252; GO:0008236; GO:0070008	GO:0006508 - The hydrolysis of proteins into smaller polypeptides and/or amino acids by cleavage of their peptide bonds.; GO:0004252 - Catalysis of the hydrolysis of internal, alpha-peptide bonds in a polypeptide chain by a catalytic mechanism that involves a catalytic triad consisting of a serine nucleophile that is activated by a proton relay involving an acidic residue (e.g. aspartate or gluta…
PAC:37946922	S. bicolor	Sobic.006G190200	0	Sobic.006G190200.1	Sobic.006G190200.1.p
PAC:37946864	S. bicolor	Sobic.006G232800	0	Sobic.006G232800.1	Sobic.006G232800.1.p	PF09731	PF09731 - Mitochondrial inner membrane protein	PTHR15415:SF7; PTHR15415	PTHR15415:SF7 - MITOCHONDRIAL INNER MEMBRANE PROTEIN; PTHR15415 - MITOFILIN					K17785	K17785 - ""	GO:0015049; GO:0015947	GO:0015947 - The chemical reactions and pathways involving methane, a colorless, odorless, flammable gas with the formula CH4. It is the simplest of the alkanes.; GO:0015049 - Catalysis of the reaction: methane + NAD(P)H + H+ + O2 = methanol + NAD(P)+ + H2O.
PAC:37946290	S. bicolor	Sobic.006G238500	0	Sobic.006G238500.1	Sobic.006G238500.1.p	PF04733	PF04733 - Coatomer epsilon subunit	PTHR10805:SF1; PTHR10805	PTHR10805 - COATOMER SUBUNIT EPSILON; PTHR10805:SF1 - SUBFAMILY NOT NAMED	KOG3081	KOG3081 - Vesicle coat complex COPI, epsilon subunit			K17268	K17268 - ""	GO:0005515; GO:0006890; GO:0005198	GO:0006890 - The directed movement of substances from the Golgi back to the endoplasmic reticulum, mediated by vesicles bearing specific protein coats such as COPI or COG.; GO:0005515 - Interacting selectively and non-covalently with any protein or protein complex (a complex of two or more proteins that may include other nonprotein molecules).; GO:0005198 - The action of a molecule that contribut…
PAC:37945515	S. bicolor	Sobic.006G249400	0	Sobic.006G249400.1	Sobic.006G249400.1.p	PF00120; PF03951	PF00120 - Glutamine synthetase, catalytic domain; PF03951 - Glutamine synthetase, beta-Grasp domain	PTHR20852; PTHR20852:SF53	PTHR20852 - GLUTAMINE SYNTHETASE; PTHR20852:SF53 - GLUTAMINE SYNTHETASE, CHLOROPLASTIC/MITOCHONDRIAL			6.3.1.2	6.3.1.2 - Glutamate--ammonia ligase	K01915	K01915 - glutamine synthetase	GO:0003824; GO:0006807; GO:0006542; GO:0004356	GO:0006807 - The chemical reactions and pathways involving organic or inorganic compounds that contain nitrogen, including (but not limited to) nitrogen fixation, nitrification, denitrification, assimilatory/dissimilatory nitrate reduction and the interconversion of nitrogenous organic matter and ammonium.; GO:0006542 - The chemical reactions and pathways resulting in the formation of glutamine, …	PWY-6549; PWY-381; PWY-6964; GLNSYN-PWY; PWY-6963; PWY-3282	PWY-6964 - ""; PWY-6963 - ""; PWY-381 - ""; GLNSYN-PWY - ""; PWY-6549 - ""; PWY-3282 - ""
PAC:37949114	S. bicolor	Sobic.006G259600	0	Sobic.006G259600.1	Sobic.006G259600.1.p	PF01636	PF01636 - Phosphotransferase enzyme family	PTHR34273:SF1; PTHR34273	PTHR34273:SF1 - METHYLTHIORIBOSE KINASE; PTHR34273 - FAMILY NOT NAMED			2.7.1.100	2.7.1.100 - S-methyl-5-thioribose kinase	K00899	K00899 - 5-methylthioribose kinase	GO:0009086; GO:0046522	GO:0046522 - Catalysis of the reaction: S-methyl-5-thio-D-ribose + ATP = S-methyl-5-thio-alpha-D-ribose 1-phosphate + ADP + 2 H(+).; GO:0009086 - The chemical reactions and pathways resulting in the formation of methionine (2-amino-4-(methylthio)butanoic acid), a sulfur-containing, essential amino acid found in peptide linkage in proteins.	PWY-7270; PWY-7528; PWY-6754	PWY-6754 - ""; PWY-7270 - ""; PWY-7528 - ""		(1 of 2) 2.7.1.100 - S-methyl-5-thioribose kinase / MTR kinase
PAC:37946748	S. bicolor	Sobic.006G266200	0	Sobic.006G266200.2	Sobic.006G266200.2.p	PF01180	PF01180 - Dihydroorotate dehydrogenase	PTHR11938	PTHR11938 - FAD NADPH DEHYDROGENASE/OXIDOREDUCTASE			1.3.5.2	1.3.5.2 - Dihydroorotate dehydrogenase (quinone)	K00254	K00254 - dihydroorotate dehydrogenase	GO:0006207; GO:0016627; GO:0003824; GO:0005737; GO:0016020; GO:0004152; GO:0055114	GO:0004152 - Catalysis of the reaction: (S)-dihydroorotate + A = AH(2) + orotate.; GO:0006207 - The chemical reactions and pathways resulting in the formation of pyrimidine nucleobases, 1,3-diazine, organic nitrogenous bases, beginning with the synthesis of a pyrimidine ring from simpler precursors.; GO:0016020 - A lipid bilayer along with all the proteins and protein complexes embedded in it an …	PWY-5686; PWY-7211; PWY0-162	PWY0-162 - ""; PWY-5686 - ""; PWY-7211 - ""		(1 of 1) 1.3.5.2 - Dihydroorotate dehydrogenase (quinone) / DHODH
PAC:37947340	S. bicolor	Sobic.006G271300	0	Sobic.006G271300.1	Sobic.006G271300.1.p	PF00168	PF00168 - C2 domain	PTHR10774:SF58; PTHR10774	PTHR10774:SF58 - SUBFAMILY NOT NAMED; PTHR10774 - EXTENDED SYNAPTOTAGMIN-RELATED	KOG1030	KOG1030 - Predicted Ca2+-dependent phospholipid-binding protein					GO:0005515	GO:0005515 - Interacting selectively and non-covalently with any protein or protein complex (a complex of two or more proteins that may include other nonprotein molecules).
PAC:37937127	S. bicolor	Sobic.007G194400	0	Sobic.007G194400.1	Sobic.007G194400.1.p	PF03081	PF03081 - Exo70 exocyst complex subunit	PTHR12542:SF45; PTHR12542	PTHR12542 - EXOCYST COMPLEX PROTEIN EXO70; PTHR12542:SF45 - SUBFAMILY NOT NAMED							GO:0006887; GO:0000145	GO:0000145 - A protein complex peripherally associated with the plasma membrane that determines where vesicles dock and fuse. At least eight complex components are conserved between yeast and mammals.; GO:0006887 - A process of secretion by a cell that results in the release of intracellular molecules (e.g. hormones, matrix proteins) contained within a membrane-bounded vesicle by fusion of the ve…
PAC:37934362	S. bicolor	Sobic.007G194800	0	Sobic.007G194800.2	Sobic.007G194800.2.p	PF04083; PF12695; PF00561	PF04083 - Partial alpha/beta-hydrolase lipase region; PF00561 - alpha/beta hydrolase fold; PF12695 - Alpha/beta hydrolase family	PTHR11005:SF38; PTHR11005	PTHR11005:SF38 - TRIACYLGLYCEROL LIPASE 2; PTHR11005 - LYSOSOMAL ACID LIPASE-RELATED	KOG2624	KOG2624 - Triglyceride lipase-cholesterol esterase	3.1.1.3	3.1.1.3 - Triacylglycerol lipase	K01052	K01052 - lysosomal acid lipase/cholesteryl ester hydrolase	GO:0016788; GO:0006629	GO:0006629 - The chemical reactions and pathways involving lipids, compounds soluble in an organic solvent but not, or sparingly, in an aqueous solvent. Includes fatty acids; neutral fats, other fatty-acid esters, and soaps; long-chain (fatty) alcohols and waxes; sphingoids and other long-chain bases; glycolipids, phospholipids and sphingolipids; and carotenes, polyprenols, sterols, terpenes and …	LIPAS-PWY	LIPAS-PWY - ""		(1 of 1) PTHR11005:SF38 - TRIACYLGLYCEROL LIPASE 2
PAC:37935858	S. bicolor	Sobic.007G211200	0	Sobic.007G211200.1	Sobic.007G211200.1.p	PF13855; PF08263; PF00069	PF08263 - Leucine rich repeat N-terminal domain; PF00069 - Protein kinase domain; PF13855 - Leucine rich repeat	PTHR27008; PTHR27008:SF41	PTHR27008 - FAMILY NOT NAMED; PTHR27008:SF41 - LEUCINE-RICH REPEAT PROTEIN KINASE-LIKE PROTEIN	KOG1187	KOG1187 - Serine/threonine protein kinase	2.7.11.1	2.7.11.1 - Non-specific serine/threonine protein kinase			GO:0005524; GO:0004713; GO:0005515; GO:0004672; GO:0006468	GO:0006468 - The process of introducing a phosphate group on to a protein.; GO:0004713 - Catalysis of the reaction: ATP + a protein tyrosine = ADP + protein tyrosine phosphate.; GO:0004672 - Catalysis of the phosphorylation of an amino acid residue in a protein, usually according to the reaction: a protein + ATP = a phosphoprotein + ADP.; GO:0005515 - Interacting selectively and non-covalently wi…				(1 of 1) PTHR27008:SF41 - LEUCINE-RICH REPEAT PROTEIN KINASE-LIKE PROTEIN
PAC:37926713	S. bicolor	Sobic.008G052900	0	Sobic.008G052900.1	Sobic.008G052900.1.p	PF00571; PF00564	PF00571 - CBS domain; PF00564 - PB1 domain	PTHR13780:SF48; PTHR13780	PTHR13780:SF48 - CBS DOMAIN-CONTAINING PROTEIN CBSCBSPB1-RELATED; PTHR13780 - AMP-ACTIVATED PROTEIN KINASE, GAMMA REGULATORY SUBUNIT							GO:0005515	GO:0005515 - Interacting selectively and non-covalently with any protein or protein complex (a complex of two or more proteins that may include other nonprotein molecules).
PAC:37928005	S. bicolor	Sobic.008G059900	0	Sobic.008G059900.2	Sobic.008G059900.2.p	PF02817; PF00198; PF00364	PF00364 - Biotin-requiring enzyme; PF02817 - e3 binding domain; PF00198 - 2-oxoacid dehydrogenases acyltransferase (catalytic domain)	PTHR23151:SF61; PTHR23151	PTHR23151 - DIHYDROLIPOAMIDE ACETYL/SUCCINYL-TRANSFERASE-RELATED; PTHR23151:SF61 - SUBFAMILY NOT NAMED	KOG0557	KOG0557 - Dihydrolipoamide acetyltransferase	2.3.1.12	2.3.1.12 - Dihydrolipoyllysine-residue acetyltransferase	K00627	K00627 - pyruvate dehydrogenase E2 component (dihydrolipoamide acetyltransferase)	GO:0016746; GO:0008152	GO:0016746 - Catalysis of the transfer of an acyl group from one compound (donor) to another (acceptor).; GO:0008152 - The chemical reactions and pathways, including anabolism and catabolism, by which living organisms transform chemical substances. Metabolic processes typically transform small molecules, but also include macromolecular processes such as DNA repair and replication, and protein syn…	PWY-5464; PYRUVDEHYD-PWY; PWY-5173	PWY-5464 - ""; PYRUVDEHYD-PWY - ""; PWY-5173 - ""		(1 of 1) PTHR23151//PTHR23151:SF61 - DIHYDROLIPOAMIDE ACETYL/SUCCINYL-TRANSFERASE-RELATED // SUBFAMILY NOT NAMED
PAC:37927897	S. bicolor	Sobic.008G062200	0	Sobic.008G062200.1	Sobic.008G062200.1.p	PF00676	PF00676 - Dehydrogenase E1 component	PTHR11516; PTHR11516:SF33	PTHR11516 - PYRUVATE DEHYDROGENASE E1 COMPONENT, ALPHA SUBUNIT BACTERIAL AND ORGANELLAR; PTHR11516:SF33 - 2-OXOISOVALERATE DEHYDROGENASE SUBUNIT ALPHA 2, MITOCHONDRIAL			1.2.4.4	1.2.4.4 - 3-methyl-2-oxobutanoate dehydrogenase (2-methylpropanoyl-transferring)	K00166	K00166 - 2-oxoisovalerate dehydrogenase E1 component alpha subunit	GO:0016624; GO:0008152	GO:0016624 - Catalysis of an oxidation-reduction (redox) reaction in which an aldehyde or ketone (oxo) group acts as a hydrogen or electron donor and reduces a disulfide.; GO:0008152 - The chemical reactions and pathways, including anabolism and catabolism, by which living organisms transform chemical substances. Metabolic processes typically transform small molecules, but also include macromolec…	PWY-5046	PWY-5046 - ""
PAC:37926262	S. bicolor	Sobic.008G065932	0	Sobic.008G065932.1	Sobic.008G065932.1.p
PAC:37922490	S. bicolor	Sobic.009G003300	FBRT-MT.4	Sobic.009G003300.1	Sobic.009G003300.1.p			PTHR33065:SF10; PTHR33065	PTHR33065 - FAMILY NOT NAMED; PTHR33065:SF10 - SUBFAMILY NOT NAMED
PAC:37919829	S. bicolor	Sobic.009G009000	FBRT-MT.4	Sobic.009G009000.1	Sobic.009G009000.1.p	PF03936; PF01397	PF03936 - Terpene synthase family, metal binding domain; PF01397 - Terpene synthase, N-terminal domain	PTHR31225	PTHR31225 - FAMILY NOT NAMED			4.2.3.123	4.2.3.123 - Beta-sesquiphellandrene synthase			GO:0000287; GO:0008152; GO:0016829; GO:0010333	GO:0000287 - Interacting selectively and non-covalently with magnesium (Mg) ions.; GO:0010333 - Catalysis of the formation of cyclic terpenes through the cyclization of linear terpenes (e.g. isopentenyl-PP, geranyl-PP, farnesyl-PP and geranylgeranyl-PP) containing varying numbers of isoprene units.; GO:0008152 - The chemical reactions and pathways, including anabolism and catabolism, by which liv…				(1 of 7) 4.2.3.123 - Beta-sesquiphellandrene synthase / Tps1
PAC:37919719	S. bicolor	Sobic.009G009800	FBRT-MT.4	Sobic.009G009800.1	Sobic.009G009800.1.p	PF00280	PF00280 - Potato inhibitor I family	PTHR33091; PTHR33091:SF10	PTHR33091 - FAMILY NOT NAMED; PTHR33091:SF10 - SUBFAMILY NOT NAMED							GO:0004867; GO:0009611	GO:0009611 - Any process that results in a change in state or activity of a cell or an organism (in terms of movement, secretion, enzyme production, gene expression, etc.) as a result of a stimulus indicating damage to the organism.; GO:0004867 - Stops, prevents or reduces the activity of serine-type endopeptidases, enzymes that catalyze the hydrolysis of nonterminal peptide bonds in a polypeptid…
PAC:37919859	S. bicolor	Sobic.009G016600	FBRT-MT.4	Sobic.009G016600.1	Sobic.009G016600.1.p	PF00249	PF00249 - Myb-like DNA-binding domain	PTHR10641; PTHR10641:SF591	PTHR10641:SF591 - SUBFAMILY NOT NAMED; PTHR10641 - MYB-LIKE DNA-BINDING PROTEIN MYB					K09422	K09422 - ""	GO:0003677	GO:0003677 - Any molecular function by which a gene product interacts selectively and non-covalently with DNA (deoxyribonucleic acid).
PAC:37921092	S. bicolor	Sobic.009G022700	FBRT-MT.4	Sobic.009G022700.1	Sobic.009G022700.1.p
PAC:37919662	S. bicolor	Sobic.009G045000	FBRT-MT.4	Sobic.009G045000.1	Sobic.009G045000.1.p	PF13181; PF00515	PF13181 - Tetratricopeptide repeat; PF00515 - Tetratricopeptide repeat	PTHR12558:SF8; PTHR12558	PTHR12558 - CELL DIVISION CYCLE 16,23,27; PTHR12558:SF8 - ANAPHASE-PROMOTING COMPLEX SUBUNIT 7	KOG1174	KOG1174 - Anaphase-promoting complex (APC), subunit 7			K03354	K03354 - anaphase-promoting complex subunit 7	GO:0005515	GO:0005515 - Interacting selectively and non-covalently with any protein or protein complex (a complex of two or more proteins that may include other nonprotein molecules).
PAC:37919411	S. bicolor	Sobic.009G057700	FBRT-MT.4	Sobic.009G057700.1	Sobic.009G057700.1.p	PF02535	PF02535 - ZIP Zinc transporter	PTHR11040; PTHR11040:SF26	PTHR11040 - ZINC/IRON TRANSPORTER; PTHR11040:SF26 - ZINC TRANSPORTER 6, CHLOROPLASTIC	KOG1558	KOG1558 - Fe2+/Zn2+ regulated transporter			K14709	K14709 - ""	GO:0055085; GO:0016020; GO:0016021; GO:0005385; GO:0046873; GO:0030001; GO:0071577	GO:0016021 - The component of a membrane consisting of the gene products and protein complexes having at least some part of their peptide sequence embedded in the hydrophobic region of the membrane.; GO:0046873 - Enables the transfer of metal ions from one side of a membrane to the other.; GO:0016020 - A lipid bilayer along with all the proteins and protein complexes embedded in it an attached to…
PAC:37919187	S. bicolor	Sobic.009G072100	HGHT-MT.4/SUCR-MT.5/BRIX-MT.5/FBRT-MT.4/JYLD-MT.3	Sobic.009G072100.1	Sobic.009G072100.1.p	PF00642	PF00642 - Zinc finger C-x8-C-x5-C-x3-H type (and similar)	PTHR14493; PTHR14493:SF41	PTHR14493:SF41 - SUBFAMILY NOT NAMED; PTHR14493 - UNCHARACTERIZED							GO:0046872	GO:0046872 - Interacting selectively and non-covalently with any metal ion.
PAC:37920672	S. bicolor	Sobic.009G072200	HGHT-MT.4/SUCR-MT.5/BRIX-MT.5/FBRT-MT.4/JYLD-MT.3	Sobic.009G072200.1	Sobic.009G072200.1.p	PF00249	PF00249 - Myb-like DNA-binding domain	PTHR12374:SF24; PTHR12374	PTHR12374:SF24 - SUBFAMILY NOT NAMED; PTHR12374 - TRANSCRIPTIONAL ADAPTOR 2 ADA2 -RELATED							GO:0003676; GO:0003677; GO:0008270	GO:0003676 - Interacting selectively and non-covalently with any nucleic acid.; GO:0003677 - Any molecular function by which a gene product interacts selectively and non-covalently with DNA (deoxyribonucleic acid).; GO:0008270 - Interacting selectively and non-covalently with zinc (Zn) ions.
PAC:37919194	S. bicolor	Sobic.009G073100	HGHT-MT.4/SUCR-MT.5/BRIX-MT.5/FBRT-MT.4/JYLD-MT.3	Sobic.009G073100.1	Sobic.009G073100.1.p	PF02535	PF02535 - ZIP Zinc transporter	PTHR11040; PTHR11040:SF52	PTHR11040:SF52 - SUBFAMILY NOT NAMED; PTHR11040 - ZINC/IRON TRANSPORTER	KOG1558	KOG1558 - Fe2+/Zn2+ regulated transporter			K14709	K14709 - ""	GO:0055085; GO:0016020; GO:0016021; GO:0005385; GO:0046873; GO:0030001; GO:0071577	GO:0016021 - The component of a membrane consisting of the gene products and protein complexes having at least some part of their peptide sequence embedded in the hydrophobic region of the membrane.; GO:0046873 - Enables the transfer of metal ions from one side of a membrane to the other.; GO:0016020 - A lipid bilayer along with all the proteins and protein complexes embedded in it an attached to…
PAC:37920533	S. bicolor	Sobic.009G074300	HGHT-MT.4/SUCR-MT.5/BRIX-MT.5/FBRT-MT.4/JYLD-MT.3	Sobic.009G074300.1	Sobic.009G074300.1.p	PF00067	PF00067 - Cytochrome P450	PTHR24286:SF68; PTHR24286	PTHR24286:SF68 - SUBFAMILY NOT NAMED; PTHR24286 - FAMILY NOT NAMED	KOG0157	KOG0157 - Cytochrome P450 CYP4/CYP19/CYP26 subfamilies	1.14.13.112	1.14.13.112 - 3-epi-6-deoxocathasterone 23-monooxygenase	K09589	K09589 - steroid 3-oxidase	GO:0005506; GO:0016705; GO:0055114; GO:0020037	GO:0020037 - Interacting selectively and non-covalently with heme, any compound of iron complexed in a porphyrin (tetrapyrrole) ring.; GO:0005506 - Interacting selectively and non-covalently with iron (Fe) ions.; GO:0016705 - Catalysis of an oxidation-reduction (redox) reaction in which hydrogen or electrons are transferred from each of two donors, and molecular oxygen is reduced or incorporated …
PAC:37919243	S. bicolor	Sobic.009G159900	FBRT-MT.4	Sobic.009G159900.1	Sobic.009G159900.1.p	PF05920; PF07526	PF07526 - Associated with HOX; PF05920 - Homeobox KN domain	PTHR11850; PTHR11850:SF91	PTHR11850 - HOMEOBOX PROTEIN TRANSCRIPTION FACTORS; PTHR11850:SF91 - SUBFAMILY NOT NAMED	KOG0773	KOG0773 - Transcription factor MEIS1 and related HOX domain proteins					GO:0003677; GO:0006355	GO:0003677 - Any molecular function by which a gene product interacts selectively and non-covalently with DNA (deoxyribonucleic acid).; GO:0006355 - Any process that modulates the frequency, rate or extent of cellular DNA-templated transcription.
PAC:37919171	S. bicolor	Sobic.009G235700	0	Sobic.009G235700.1	Sobic.009G235700.1.p	PF07690	PF07690 - Major Facilitator Superfamily	PTHR23500:SF123; PTHR23500	PTHR23500:SF123 - SUBFAMILY NOT NAMED; PTHR23500 - FAMILY NOT NAMED	KOG0254	KOG0254 - Predicted transporter (major facilitator superfamily)			K08145	K08145 - ""	GO:0022891; GO:0055085; GO:0016020; GO:0016021	GO:0016021 - The component of a membrane consisting of the gene products and protein complexes having at least some part of their peptide sequence embedded in the hydrophobic region of the membrane.; GO:0016020 - A lipid bilayer along with all the proteins and protein complexes embedded in it an attached to it.; GO:0022891 - Enables the transfer of a specific substance or group of related substan…				(1 of 5) K08145 - MFS transporter, SP family, solute carrier family 2 (facilitated glucose transporter), member 8 (SLC2A8, GLUT8)
PAC:37921640	S. bicolor	Sobic.009G242200	0	Sobic.009G242200.1	Sobic.009G242200.1.p	PF00069	PF00069 - Protein kinase domain	PTHR24055:SF218; PTHR24055	PTHR24055 - MITOGEN-ACTIVATED PROTEIN KINASE; PTHR24055:SF218 - SUBFAMILY NOT NAMED			2.7.11.24	2.7.11.24 - Mitogen-activated protein kinase	K04371	K04371 - mitogen-activated protein kinase 1/3	GO:0005524; GO:0004713; GO:0004672; GO:0006468	GO:0006468 - The process of introducing a phosphate group on to a protein.; GO:0004713 - Catalysis of the reaction: ATP + a protein tyrosine = ADP + protein tyrosine phosphate.; GO:0004672 - Catalysis of the phosphorylation of an amino acid residue in a protein, usually according to the reaction: a protein + ATP = a phosphoprotein + ADP.; GO:0005524 - Interacting selectively and non-covalently wi…
PAC:37920060	S. bicolor	Sobic.009G250800	0	Sobic.009G250800.1	Sobic.009G250800.1.p	PF12708	PF12708 - Pectate lyase superfamily protein	PTHR31339; PTHR31339:SF13	PTHR31339 - FAMILY NOT NAMED; PTHR31339:SF13 - SUBFAMILY NOT NAMED
PAC:37919792	S. bicolor	Sobic.009G258100	0	Sobic.009G258100.1	Sobic.009G258100.1.p	PF14703; PF13967; PF02714	PF02714 - Calcium-dependent channel, 7TM region, putative phosphate; PF14703 - Cytosolic domain of 10TM putative phosphate transporter; PF13967 - Late exocytosis, associated with Golgi transport	PTHR13018; PTHR13018:SF48	PTHR13018 - PROBABLE MEMBRANE PROTEIN DUF221-RELATED; PTHR13018:SF48 - SUBFAMILY NOT NAMED							GO:0016020	GO:0016020 - A lipid bilayer along with all the proteins and protein complexes embedded in it an attached to it.

## Sheet: gramene
Gene	Chr	Start_v2	End_v2	Start_v3	Start_v3
Sobic.001G004800	1	406465	407527	406446	407508
Sobic.001G008800	1	824663	826543	824643	826523
Sobic.001G012000	1	1031540	1034091	1031520	1034071
Sobic.001G012300	1	1138664	1141020	1144011	1146367
Sobic.001G012400	1	1147154	1148632	1152501	1153979
Sobic.001G013400	1	1233768	1238063	1239115	1243410
Sobic.001G028100	1	2172886	2179662	2178240	2185016	DTFL-MT.1/RSUG-MT.1/JYLD-MT.1/BRIX-MT.1/SUCR-MT.1
Sobic.001G030600	1	2360309	2362068	2365663	2367422	DTFL-MT.1/RSUG-MT.1/JYLD-MT.1/BRIX-MT.1/SUCR-MT.1
Sobic.001G036300	1	2702505	2710796	2707859	2716150	DTFL-MT.1/RSUG-MT.1/JYLD-MT.1/BRIX-MT.1/SUCR-MT.1
Sobic.001G100600	1	7661905	7663898	7670177	7672170	DTFL-MT.1/RSUG-MT.1/JYLD-MT.1/BRIX-MT.1/SUCR-MT.1
Sobic.001G172200	1	14372810	14375589	14407251	14410030	DTFL-MT.1
Sobic.001G264201	1	41867187	41872690	49025438	49030941	DTFL-MT.1
Sobic.001G481400	1	68123855	68125550	75312217	75313912	DTFL-MT.2/HGHT-MT.1/FBMS-MT.1
Sobic.001G511000	1	70670491	70675728	77861301	77866538	DTFL-MT.2/HGHT-MT.1/FBMS-MT.1
Sobic.001G518700	1	71294107	71295086	78485201	78486180	DTFL-MT.2/HGHT-MT.1/FBMS-MT.1
Sobic.001G525900	1	71794208	71800129	78988198	78994119	DTFL-MT.2/HGHT-MT.1/FBMS-MT.1
Sobic.001G534532	1	72598864	72601542	79774445	79777129	DTFL-MT.2/HGHT-MT.1/FBMS-MT.1
Sobic.001G538100	1	72901813	72906438	80077132	80081757	DTFL-MT.2/HGHT-MT.1/FBMS-MT.1
Sobic.002G067000	2	6638124	6640987	6627634	6630497
Sobic.002G075800	2	7885114	7888823	7874437	7878146
Sobic.002G079300	2	8254541	8255705	8243864	8245028
Sobic.002G104400	2	12369914	12381805	12357209	12369100
Sobic.002G124900	2	16890904	16893505	16878217	16880818
Sobic.002G128101	2	17706602	17713838	17693791	17701027
Sobic.002G201600	2	59121897	59125075	59154995	59158173
Sobic.002G203000	2	59285659	59287666	59318757	59320764
Sobic.002G204300	2	59528296	59534032	59561394	59567130
Sobic.002G204400	2	59547484	59561474	59580582	59594572
Sobic.002G220300	2	61128821	61131133	61161894	61164206
Sobic.002G220600	2	61185133	61191843	61218206	61224916
Sobic.002G227300	2	61884089	61886559	61926478	61928948
Sobic.002G259900	2	64477110	64483013	64525895	64531798
Sobic.002G302000	2	67817104	67821250	67844329	67848475
Sobic.002G317800	2	69002527	69005271	69029732	69032476
Sobic.002G320600	2	69168186	69175444	69195391	69202649
Sobic.002G326800	2	69648347	69651434	69675470	69678557
Sobic.002G327201	2	69672100	69673772	69699223	69700895
Sobic.002G327500	2	69683265	69687304	69710388	69714427
Sobic.002G329100	2	69799084	69802811	69826207	69829934
Sobic.002G329500	2	69821919	69825032	69849041	69852154
Sobic.002G397600	2	74879973	74883383	74926954	74930364
Sobic.002G407300	2	75610572	75613467	75657550	75660445
Sobic.002G407500	2	75618118	75621214	75665096	75668192
Sobic.002G409900	2	75789214	75793465	75836192	75840443
Sobic.003G021900	3	1880607	1882169	1880607	1882169
Sobic.003G031100	3	2833693	2837326	2833693	2837326
Sobic.003G040600	3	3770262	3773843	3769210	3772791
Sobic.003G061300	3	5389666	5394795	5388274	5393403
Sobic.003G064200	3	5563588	5566331	5562196	5564939
Sobic.003G079700	3	6836710	6840591	6833746	6837627
Sobic.003G084200	3	7232120	7238331	7229152	7235363
Sobic.003G104350	3	9343234	9345667	9337676	9342146
Sobic.003G109832	3	9931560	9932733	9913267	9915741
Sobic.003G109900	3	9933516	9937482	9915860	9920670
Sobic.003G124200	3	11296924	11299524	11282112	11284712
Sobic.003G139900	3	13625234	13631351	13608149	13614266
Sobic.003G178700	3	45954127	45956418	45955817	45958108
Sobic.003G195600	3	52003871	52007677	51971321	51975127	RSUG-MT.2
Sobic.003G203500	3	53351238	53359397	53331225	53339384	RSUG-MT.2
Sobic.003G213000	3	54756823	54760054	54740858	54744089	RSUG-MT.2
Sobic.003G229700	3	56961893	56968710	56945925	56952742	RSUG-MT.2/SUCR-MT.2
Sobic.003G393100	3	70438777	70450224	70415523	70426970	HGHT-MT.2/FBRT-MT.1
Sobic.003G397300	3	70733697	70734538	70710569	70711410	HGHT-MT.2/FBRT-MT.1
Sobic.003G400200	3	70906953	70908621	70883840	70885508	HGHT-MT.2/FBRT-MT.1
Sobic.003G413201	3	72078818	72081203	72058030	72060415	HGHT-MT.2/FBRT-MT.1
Sobic.003G424400	3	72869845	72873368	72848732	72852255	HGHT-MT.2/FBRT-MT.1
Sobic.003G437400	3	73814207	73815962	73791694	73793449
Sobic.003G445900	3	74385876	74390611	74363802	74368537
Sobic.004G024400	4	2006550	2011380	1987999	1992829	RSUG-MT.3
Sobic.004G036200	4	2933760	2937172	2915210	2918622	RSUG-MT.3
Sobic.004G037200	4	3000615	3008883	2982065	2990333	RSUG-MT.3
Sobic.004G087500	4	7428304	7431715	7408007	7411418
Sobic.004G109100	4	10577778	10578490	10548772	10549484
Sobic.004G112100	4	11135114	11143531	11072572	11080989
Sobic.004G128600	4	16254005	16255714	16249333	16251042
Sobic.004G143900	4	42926313	42935168	43520796	43529651
Sobic.004G148600	4	46043631	46059485	46677122	46692976
Sobic.004G159100	4	49827926	49831114	50526938	50530126
Sobic.004G167300	4	51020180	51021584	51736984	51738388
Sobic.004G296300	4	62913674	62916929	63598213	63601468
Sobic.004G297600	4	63014819	63018361	63699358	63702900
Sobic.004G299300	4	63159095	63163385	63843634	63847924
Sobic.004G310100	4	64013924	64015523	64698452	64700051
Sobic.004G323800	4	65162909	65165990	65847436	65850517
Sobic.004G347500	4	66989686	66994383	67680244	67684941
Sobic.004G351100	4	67277539	67287942	67969287	67979690
Sobic.005G033100	5	2966500	2974271	2947606	2959266
Sobic.005G033801	5	3070099	3071538	3055094	3056533
Sobic.005G036000	5	3287704	3288971	3272702	3273969
Sobic.005G038500	5	3546944	3550112	3532042	3535210
Sobic.005G052000	5	5128611	5130393	5114336	5116118
Sobic.005G057700	5	5977858	5993694	5912195	5928031
Sobic.005G062700	5	6871264	6874191	6805602	6808529
Sobic.005G064600	5	7250885	7253089	7185091	7187295
Sobic.005G082100	5	10868418	10871568	10817663	10820813
Sobic.005G084300	5	11541422	11544540	11464730	11467848
Sobic.005G087400	5	12386760	12394266	12309940	12317446
Sobic.005G093800	5	14662338	14665066	14560741	14563469
Sobic.005G094001	5	14666849	14673298	14565253	14571702
Sobic.005G103200	5	18282302	18286607	18197811	18202116
Sobic.005G137400	5	49468938	49471207	59023582	59025851
Sobic.005G165500	5	54550730	54556277	64134373	64139920
Sobic.005G169200	5	55226181	55228186	64809824	64811829
Sobic.005G169400	5	55239306	55240457	64822949	64824100
Sobic.005G182200	5	56891123	56893748	66474756	66477381
Sobic.005G183900	5	57301938	57309145	66885571	66892778
Sobic.006G050500	6	37738130	37748000	37777620	37787490
Sobic.006G076000	6	44963574	44964934	44064996	44066356	BRIX-MT.3/HGHT-MT.3/FBRT-MT.2/SUCR-MT.3/FBMS-MT.2/JYLD-MT.2
Sobic.006G098200	6	47669817	47675725	46763198	46769106	BRIX-MT.3/FBRT-MT.2/SUCR-MT.3/FBMS-MT.2/JYLD-MT.2
Sobic.006G121200	6	49688124	49692141	48781505	48785522	FBRT-MT.2/JYLD-MT.2/BRIX-MT.4/SUCR-MT.4
Sobic.006G123000	6	49784834	49788269	48878215	48881650	FBRT-MT.2/JYLD-MT.2/BRIX-MT.4/SUCR-MT.4
Sobic.006G128200	6	50235229	50237336	49328610	49330717	FBRT-MT.2/JYLD-MT.2/BRIX-MT.4/SUCR-MT.4
Sobic.006G142500	6	51364258	51368348	50457749	50461839	FBRT-MT.2/JYLD-MT.2/BRIX-MT.4/SUCR-MT.4
Sobic.006G164300	6	53119437	53123372	52196943	52200878	FBRT-MT.2/BRIX-MT.4/SUCR-MT.4
Sobic.006G176600	6	54110403	54115237	53182512	53187346	BRIX-MT.4/SUCR-MT.4
Sobic.006G177000	6	54141399	54143491	53213508	53215600	BRIX-MT.4/SUCR-MT.4
Sobic.006G177800	6	54177545	54183460	53249654	53255569	BRIX-MT.4/SUCR-MT.4
Sobic.006G190200	6	55358420	55360494	54430520	54432594
Sobic.006G232800	6	58436388	58442908	57508489	57515009
Sobic.006G238500	6	58870189	58876946	57942291	57949048
Sobic.006G249400	6	59801420	59805932	58873522	58878034
Sobic.006G259600	6	60446597	60450347	59518697	59522447
Sobic.006G266200	6	60902992	60908510	59975093	59980611
Sobic.006G271300	6	61241729	61243488	60314012	60315771
Sobic.007G194400	7	61425425	61427776	62678809	62681160
Sobic.007G194800	7	61466766	61470504	62720085	62723823
Sobic.007G211200	7	62770387	62772940	64024341	64026894
Sobic.008G052900	8	5296835	5317096	5324056	5344317
Sobic.008G059900	8	6355169	6360009	6382390	6387230
Sobic.008G062200	8	6582067	6585587	6609288	6612808
Sobic.008G065932	8	7361754	7372593	7394549	7405388
Sobic.009G003300	9	281491	284133	281759	284401	FBRT-MT.4
Sobic.009G009000	9	837690	841964	837988	842262	FBRT-MT.4
Sobic.009G009800	9	933250	934054	933548	934352	FBRT-MT.4
Sobic.009G016600	9	1544026	1546153	1549684	1551811	FBRT-MT.4
Sobic.009G022700	9	1985211	1989852	1996531	2001172	FBRT-MT.4
Sobic.009G045000	9	4333866	4342018	4289177	4297329	FBRT-MT.4
Sobic.009G057700	9	6008571	6011547	5972474	5975450	FBRT-MT.4
Sobic.009G072100	9	8728283	8730598	8705342	8707657	HGHT-MT.4/SUCR-MT.5/BRIX-MT.5/FBRT-MT.4/JYLD-MT.3
Sobic.009G072200	9	8823606	8825585	8808799	8810778	HGHT-MT.4/SUCR-MT.5/BRIX-MT.5/FBRT-MT.4/JYLD-MT.3
Sobic.009G073100	9	9079249	9081705	9075915	9078371	HGHT-MT.4/SUCR-MT.5/BRIX-MT.5/FBRT-MT.4/JYLD-MT.3
Sobic.009G074300	9	9361873	9366833	9358716	9363676	HGHT-MT.4/SUCR-MT.5/BRIX-MT.5/FBRT-MT.4/JYLD-MT.3
Sobic.009G159900	9	51786903	51791752	51761909	51766758	FBRT-MT.4
Sobic.009G235700	9	57468124	57472883	57463125	57468608
Sobic.009G242200	9	57881934	57887310	57877842	57883218
Sobic.009G250800	9	58585799	58587897	58582093	58584191
Sobic.009G258100	9	59203619	59210880	59199953	59207214

## Sheet: input
Gene	Size	Chr	Start_v3	Start_v3
Sobic.001G004800	1063	Chr01	406446	407508	Sobic.001G004800
Sobic.001G008800	1881	Chr01	824643	826523	Sobic.001G008800
Sobic.001G012000	2552	Chr01	1031520	1034071	Sobic.001G012000
Sobic.001G012300	2357	Chr01	1144011	1146367	Sobic.001G012300
Sobic.001G012400	1479	Chr01	1152501	1153979	Sobic.001G012400
Sobic.001G013400	4296	Chr01	1239115	1243410	Sobic.001G013400
Sobic.001G028100	6777	Chr01	2178240	2185016	Sobic.001G028100
Sobic.001G030600	1760	Chr01	2365663	2367422	Sobic.001G030600
Sobic.001G036300	8292	Chr01	2707859	2716150	Sobic.001G036300
Sobic.001G100600	1994	Chr01	7670177	7672170	Sobic.001G100600
Sobic.001G172200	2780	Chr01	14407251	14410030	Sobic.001G172200
Sobic.001G264201	5504	Chr01	49025438	49030941	Sobic.001G264201
Sobic.001G481400	1696	Chr01	75312217	75313912	Sobic.001G481400
Sobic.001G511000	5238	Chr01	77861301	77866538	Sobic.001G511000
Sobic.001G518700	980	Chr01	78485201	78486180	Sobic.001G518700
Sobic.001G525900	5922	Chr01	78988198	78994119	Sobic.001G525900
Sobic.001G534532	2685	Chr01	79774445	79777129	Sobic.001G534532
Sobic.001G538100	4626	Chr01	80077132	80081757	Sobic.001G538100
Sobic.002G067000	2864	Chr02	6627634	6630497	Sobic.002G067000
Sobic.002G075800	3710	Chr02	7874437	7878146	Sobic.002G075800
Sobic.002G079300	1165	Chr02	8243864	8245028	Sobic.002G079300
Sobic.002G104400	11892	Chr02	12357209	12369100	Sobic.002G104400
Sobic.002G124900	2602	Chr02	16878217	16880818	Sobic.002G124900
Sobic.002G128101	7237	Chr02	17693791	17701027	Sobic.002G128101
Sobic.002G201600	3179	Chr02	59154995	59158173	Sobic.002G201600
Sobic.002G203000	2008	Chr02	59318757	59320764	Sobic.002G203000
Sobic.002G204300	5737	Chr02	59561394	59567130	Sobic.002G204300
Sobic.002G204400	13991	Chr02	59580582	59594572	Sobic.002G204400
Sobic.002G220300	2313	Chr02	61161894	61164206	Sobic.002G220300
Sobic.002G220600	6711	Chr02	61218206	61224916	Sobic.002G220600
Sobic.002G227300	2471	Chr02	61926478	61928948	Sobic.002G227300
Sobic.002G259900	5904	Chr02	64525895	64531798	Sobic.002G259900
Sobic.002G302000	4147	Chr02	67844329	67848475	Sobic.002G302000
Sobic.002G317800	2745	Chr02	69029732	69032476	Sobic.002G317800
Sobic.002G320600	7259	Chr02	69195391	69202649	Sobic.002G320600
Sobic.002G326800	3088	Chr02	69675470	69678557	Sobic.002G326800
Sobic.002G327201	1673	Chr02	69699223	69700895	Sobic.002G327201
Sobic.002G327500	4040	Chr02	69710388	69714427	Sobic.002G327500
Sobic.002G329100	3728	Chr02	69826207	69829934	Sobic.002G329100
Sobic.002G329500	3114	Chr02	69849041	69852154	Sobic.002G329500
Sobic.002G397600	3411	Chr02	74926954	74930364	Sobic.002G397600
Sobic.002G407300	2896	Chr02	75657550	75660445	Sobic.002G407300
Sobic.002G407500	3097	Chr02	75665096	75668192	Sobic.002G407500
Sobic.002G409900	4252	Chr02	75836192	75840443	Sobic.002G409900
Sobic.003G021900	1563	Chr03	1880607	1882169	Sobic.003G021900
Sobic.003G031100	3634	Chr03	2833693	2837326	Sobic.003G031100
Sobic.003G040600	3582	Chr03	3769210	3772791	Sobic.003G040600
Sobic.003G061300	5130	Chr03	5388274	5393403	Sobic.003G061300
Sobic.003G064200	2744	Chr03	5562196	5564939	Sobic.003G064200
Sobic.003G079700	3882	Chr03	6833746	6837627	Sobic.003G079700
Sobic.003G084200	6212	Chr03	7229152	7235363	Sobic.003G084200
Sobic.003G104350	4471	Chr03	9337676	9342146	Sobic.003G104350
Sobic.003G109832	2475	Chr03	9913267	9915741	Sobic.003G109832
Sobic.003G109900	4811	Chr03	9915860	9920670	Sobic.003G109900
Sobic.003G124200	2601	Chr03	11282112	11284712	Sobic.003G124200
Sobic.003G139900	6118	Chr03	13608149	13614266	Sobic.003G139900
Sobic.003G178700	2292	Chr03	45955817	45958108	Sobic.003G178700
Sobic.003G195600	3807	Chr03	51971321	51975127	Sobic.003G195600
Sobic.003G203500	8160	Chr03	53331225	53339384	Sobic.003G203500
Sobic.003G213000	3232	Chr03	54740858	54744089	Sobic.003G213000
Sobic.003G229700	6818	Chr03	56945925	56952742	Sobic.003G229700
Sobic.003G393100	11448	Chr03	70415523	70426970	Sobic.003G393100
Sobic.003G397300	842	Chr03	70710569	70711410	Sobic.003G397300
Sobic.003G400200	1669	Chr03	70883840	70885508	Sobic.003G400200
Sobic.003G413201	2386	Chr03	72058030	72060415	Sobic.003G413201
Sobic.003G424400	3524	Chr03	72848732	72852255	Sobic.003G424400
Sobic.003G437400	1756	Chr03	73791694	73793449	Sobic.003G437400
Sobic.003G445900	4736	Chr03	74363802	74368537	Sobic.003G445900
Sobic.004G024400	4831	Chr04	1987999	1992829	Sobic.004G024400
Sobic.004G036200	3413	Chr04	2915210	2918622	Sobic.004G036200
Sobic.004G037200	8269	Chr04	2982065	2990333	Sobic.004G037200
Sobic.004G087500	3412	Chr04	7408007	7411418	Sobic.004G087500
Sobic.004G109100	713	Chr04	10548772	10549484	Sobic.004G109100
Sobic.004G112100	8418	Chr04	11072572	11080989	Sobic.004G112100
Sobic.004G128600	1710	Chr04	16249333	16251042	Sobic.004G128600
Sobic.004G143900	8856	Chr04	43520796	43529651	Sobic.004G143900
Sobic.004G148600	15855	Chr04	46677122	46692976	Sobic.004G148600
Sobic.004G159100	3189	Chr04	50526938	50530126	Sobic.004G159100
Sobic.004G167300	1405	Chr04	51736984	51738388	Sobic.004G167300
Sobic.004G296300	3256	Chr04	63598213	63601468	Sobic.004G296300
Sobic.004G297600	3543	Chr04	63699358	63702900	Sobic.004G297600
Sobic.004G299300	4291	Chr04	63843634	63847924	Sobic.004G299300
Sobic.004G310100	1600	Chr04	64698452	64700051	Sobic.004G310100
Sobic.004G323800	3082	Chr04	65847436	65850517	Sobic.004G323800
Sobic.004G347500	4698	Chr04	67680244	67684941	Sobic.004G347500
Sobic.004G351100	10404	Chr04	67969287	67979690	Sobic.004G351100
Sobic.005G033100	11661	Chr05	2947606	2959266	Sobic.005G033100
Sobic.005G033801	1440	Chr05	3055094	3056533	Sobic.005G033801
Sobic.005G036000	1268	Chr05	3272702	3273969	Sobic.005G036000
Sobic.005G038500	3169	Chr05	3532042	3535210	Sobic.005G038500
Sobic.005G052000	1783	Chr05	5114336	5116118	Sobic.005G052000
Sobic.005G057700	15837	Chr05	5912195	5928031	Sobic.005G057700
Sobic.005G062700	2928	Chr05	6805602	6808529	Sobic.005G062700
Sobic.005G064600	2205	Chr05	7185091	7187295	Sobic.005G064600
Sobic.005G082100	3151	Chr05	10817663	10820813	Sobic.005G082100
Sobic.005G084300	3119	Chr05	11464730	11467848	Sobic.005G084300
Sobic.005G087400	7507	Chr05	12309940	12317446	Sobic.005G087400
Sobic.005G093800	2729	Chr05	14560741	14563469	Sobic.005G093800
Sobic.005G094001	6450	Chr05	14565253	14571702	Sobic.005G094001
Sobic.005G103200	4306	Chr05	18197811	18202116	Sobic.005G103200
Sobic.005G137400	2270	Chr05	59023582	59025851	Sobic.005G137400
Sobic.005G165500	5548	Chr05	64134373	64139920	Sobic.005G165500
Sobic.005G169200	2006	Chr05	64809824	64811829	Sobic.005G169200
Sobic.005G169400	1152	Chr05	64822949	64824100	Sobic.005G169400
Sobic.005G182200	2626	Chr05	66474756	66477381	Sobic.005G182200
Sobic.005G183900	7208	Chr05	66885571	66892778	Sobic.005G183900
Sobic.006G050500	9871	Chr06	37777620	37787490	Sobic.006G050500
Sobic.006G076000	1361	Chr06	44064996	44066356	Sobic.006G076000
Sobic.006G098200	5909	Chr06	46763198	46769106	Sobic.006G098200
Sobic.006G121200	4018	Chr06	48781505	48785522	Sobic.006G121200
Sobic.006G123000	3436	Chr06	48878215	48881650	Sobic.006G123000
Sobic.006G128200	2108	Chr06	49328610	49330717	Sobic.006G128200
Sobic.006G142500	4091	Chr06	50457749	50461839	Sobic.006G142500
Sobic.006G164300	3936	Chr06	52196943	52200878	Sobic.006G164300
Sobic.006G176600	4835	Chr06	53182512	53187346	Sobic.006G176600
Sobic.006G177000	2093	Chr06	53213508	53215600	Sobic.006G177000
Sobic.006G177800	5916	Chr06	53249654	53255569	Sobic.006G177800
Sobic.006G190200	2075	Chr06	54430520	54432594	Sobic.006G190200
Sobic.006G232800	6521	Chr06	57508489	57515009	Sobic.006G232800
Sobic.006G238500	6758	Chr06	57942291	57949048	Sobic.006G238500
Sobic.006G249400	4513	Chr06	58873522	58878034	Sobic.006G249400
Sobic.006G259600	3751	Chr06	59518697	59522447	Sobic.006G259600
Sobic.006G266200	5519	Chr06	59975093	59980611	Sobic.006G266200
Sobic.006G271300	1760	Chr06	60314012	60315771	Sobic.006G271300
Sobic.007G194400	2352	Chr07	62678809	62681160	Sobic.007G194400
Sobic.007G194800	3739	Chr07	62720085	62723823	Sobic.007G194800
Sobic.007G211200	2554	Chr07	64024341	64026894	Sobic.007G211200
Sobic.008G052900	20262	Chr08	5324056	5344317	Sobic.008G052900
Sobic.008G059900	4841	Chr08	6382390	6387230	Sobic.008G059900
Sobic.008G062200	3521	Chr08	6609288	6612808	Sobic.008G062200
Sobic.008G065932	10840	Chr08	7394549	7405388	Sobic.008G065932
Sobic.009G003300	2643	Chr09	281759	284401	Sobic.009G003300
Sobic.009G009000	4275	Chr09	837988	842262	Sobic.009G009000
Sobic.009G009800	805	Chr09	933548	934352	Sobic.009G009800
Sobic.009G016600	2128	Chr09	1549684	1551811	Sobic.009G016600
Sobic.009G022700	4642	Chr09	1996531	2001172	Sobic.009G022700
Sobic.009G045000	8153	Chr09	4289177	4297329	Sobic.009G045000
Sobic.009G057700	2977	Chr09	5972474	5975450	Sobic.009G057700
Sobic.009G072100	2316	Chr09	8705342	8707657	Sobic.009G072100
Sobic.009G072200	1980	Chr09	8808799	8810778	Sobic.009G072200
Sobic.009G073100	2457	Chr09	9075915	9078371	Sobic.009G073100
Sobic.009G074300	4961	Chr09	9358716	9363676	Sobic.009G074300
Sobic.009G159900	4850	Chr09	51761909	51766758	Sobic.009G159900
Sobic.009G235700	5484	Chr09	57463125	57468608	Sobic.009G235700
Sobic.009G242200	5377	Chr09	57877842	57883218	Sobic.009G242200
Sobic.009G250800	2099	Chr09	58582093	58584191	Sobic.009G250800
Sobic.009G258100	7262	Chr09	59199953	59207214	Sobic.009G258100
